# Supplementary material
Source: publisher figshare collection journal article supplement (https://tandf.figshare.com/ndownloader/files/15616133)
Supplement: Supplementary file 1 [file 15616133]

## Sheet: default
row ID	Standardized	logBCF	CAS
1	BrC(=C)c1ccccc1	2.19	98-81-7
2	BrC(Br)Br	1.15	75-25-2
3	BrCCBr	0.59	106-93-4
4	CC(C)(C)OOC(C)(C)CCC(C)(C)OOC(C)(C)C	3.62	78-63-7
5	FC(F)(F)C1(F)C(F)(F)C(F)(F)C(F)(F)C(F)(F)C1(F)C(F)(F)F	3.92	306-98-9
6	FC(F)(F)c1ccc(Cl)c(Cl)c1	3.18	328-84-7
7	FC(F)(F)c1ccc(Cl)cc1Cl	3.51	320-60-5
8	FC(F)(F)c1cccc(Cl)c1	2.34	98-15-7
9	FC(F)(F)c1cccc(c1)C(F)(F)F	2.51	402-31-3
10	FC(F)(F)c1ccccc1	1.67	98-08-8
11	F[Sn](c1ccccc1)(c1ccccc1)c1ccccc1	3.66	379-52-2
12	CC(C)(C)c1cc(C(O)=O)c(O)c(c1)C(C)(C)C	0.98	19715-19-6
13	N#CCCNCCC#N	-0.36	111-94-4
14	N#CSCSc1nc2ccccc2s1	2.07	21564-17-0
15	N#Cc1ccc(cc1)C#N	0.24	623-26-7
16	N#Cc1cccc(c1)C#N	0.57	626-17-5
17	N#Cc1ccccc1C#N	0.4	91-15-6
18	N(c1ccc(Nc2ccc3ccccc3c2)cc1)c1ccc2ccccc2c1	3.28	93-46-9
19	N(c1ccccc1)c1ccc(Nc2ccccc2)cc1	3.13	74-31-7
20	N(c1ccccc1)c1ccc2ccccc2c1	2.37	135-88-6
21	N(c1ccccc1)c1cccc2ccccc12	3.23	90-30-2
22	CC(C)(C)c1cc(CCC(=O)OCC(COC(=O)CCc2cc(c(O)c(c2)C(C)(C)C)C(C)(C)C)(COC(=O)CCc2cc(c(O)c(c2)C(C)(C)C)C(C)(C)C)COC(=O)CCc2cc(c(O)c(c2)C(C)(C)C)C(C)(C)C)cc(c1O)C(C)(C)C	-0.17	6683-19-8
23	N(c1ccccc1)c1ccccc1	2.21	122-39-4
24	N1c2ccccc2Sc2ccccc12	2.63	92-84-2
25	N=C(Nc1ccccc1)Nc1ccccc1	0.8	102-06-7
26	NC(=N)NC#N	0.49	461-58-5
27	NC(=O)C1CC=CCC1C(O)=O	0.54	47095
28	NC(=O)N=NC(N)=O	1.18	123-77-3
29	NC(=O)c1[nH]cnc1N	0.72	360-97-4
30	NC(=O)c1c(Cl)c(Cl)c(Cl)c(Cl)c1C(O)=O	0.49	56113-42-9
31	CC(C)(C)c1cc(CO)cc(c1O)C(C)(C)C	1.52	88-26-6
32	NC(N)=S	0.3	62-56-6
33	NCC1CCC(CC1)C(O)=O	1.01	1197-18-8
34	NCCNCCN	0.34	111-40-0
35	NCCNCCNCCN	0.2	112-24-3
36	NCCNCCO	0.32	111-41-1
37	NCCNCc1ccccc1	0.6	822775
38	NCc1cccc(CN)c1	-0.04	1477-55-0
39	NNC(N)=S	1.1	79-19-6
40	NNS(=O)(=O)c1ccc(Oc2ccc(cc2)S(=O)(=O)NN)cc1	-0.02	80-51-3
41	CC(C)(C)c1cc(Cc2cc(c(O)c(c2)C(C)(C)C)C(C)(C)C)cc(c1O)C(C)(C)C	3.28	118-82-1
42	NS(=O)(=O)c1ccccc1	0.52	98-10-2
43	Nc1c(Cl)c(Cl)c(Cl)c(Cl)c1Cl	2.94	527-20-8
44	Nc1c(Cl)c(Cl)cc(Cl)c1Cl	2.78	3481-20-7
45	Nc1c(Cl)cc(Cl)cc1Cl	2.12	634-93-5
46	Nc1c(Cl)cc(cc1S(O)(=O)=O)-c1cc(Cl)c(N)c(c1)S(O)(=O)=O	0.2	123251-96-7
47	Nc1c(Cl)cc(cc1[N+]([O-])=O)[N+]([O-])=O	1.04	3531-19-9
48	Nc1c(N=Nc2ccc(cc2)S(=O)(=O)CCOS(O)(=O)=O)c(cc2cc(c(N=Nc3ccc(cc3)S(=O)(=O)CCOS(O)(=O)=O)c(O)c12)S(O)(=O)=O)S(O)(=O)=O	1.04	17095-24-8
49	Nc1c(Oc2ccc(Br)cc2)cc(O)c2C(=O)c3ccccc3C(=O)c12	2.05	59722-76-8
50	Nc1c(cc(c2cccc(O)c12)S(O)(=O)=O)S(O)(=O)=O	0.9	52789-62-5
51	CC(C)(C)c1cc(Cn2c(=O)n(Cc3cc(c(O)c(c3)C(C)(C)C)C(C)(C)C)c(=O)n(Cc3cc(c(O)c(c3)C(C)(C)C)C(C)(C)C)c2=O)cc(c1O)C(C)(C)C	0.27	27676-62-6
52	Nc1c2C(=O)c3ccccc3C(=O)c2c(Br)cc1S(O)(=O)=O	0.17	1591885
53	Nc1c2C(=O)c3ccccc3C(=O)c2c(Nc2cccc(c2)S(=O)(=O)CCOS(O)(=O)=O)cc1S(O)(=O)=O	0.6	2580-78-1
54	Nc1cc(Cl)c(Cl)c(Cl)c1	2.36	634-91-3
55	Nc1cc(Cl)c(Cl)c(Cl)c1Cl	2.45	634-83-3
56	Nc1cc(Cl)c(Cl)cc1Cl	2.33	636-30-6
57	Nc1cc(Cl)ccc1Cl	1.22	95-82-9
58	Nc1cc(c(O)c2C(=O)c3c(N)cc(c(O)c3C(=O)c12)S(O)(=O)=O)S(O)(=O)=O	0.31	351002
59	Nc1cc(cc2cc(cc(O)c12)S(O)(=O)=O)S(O)(=O)=O	0.46	1300333
60	Nc1ccc(C=Cc2ccc(N)cc2S(O)(=O)=O)c(c1)S(O)(=O)=O	0.28	25394-13-2
61	CC(C)(C)c1cc(N=Nc2ccccc2[N+]([O-])=O)c(O)c(c1)C(C)(C)C	3.68	52184-14-2
62	Nc1ccc(Cc2ccc(N)c(Cl)c2)cc1Cl	2.39	101-14-4
63	Nc1ccc(Cc2ccc(N)c(Cl)c2Cl)c(Cl)c1Cl	3.43	42240-73-3
64	Nc1ccc(Cc2ccc(N)cc2)cc1	1	101-77-9
65	Nc1ccc(Cl)c(Cl)c1	1.13	95-76-1
66	Nc1ccc(Cl)c(Cl)c1Cl	2	634-67-3
67	Nc1ccc(Cl)cc1	0.71	106-47-8
68	Nc1ccc(Cl)cc1Cl	1.4	554-00-7
69	Nc1ccc(Cl)cc1[N+]([O-])=O	1.03	89-63-4
70	Nc1ccc(N)cc1	1.8	106-50-3
71	Nc1ccc(O)cc1	1.62	123-30-8
72	CC(C)(C)c1cc(c(O)c(c1)C(C)(C)C)-n1nc2ccc(Cl)cc2n1	3.57	3864-99-1
73	Nc1ccc(c2ccccc12)S(O)(=O)=O	0.78	130-13-2
74	Nc1ccc(cc1)N=Nc1ccccc1	1.56	60-09-3
75	Nc1ccc(cc1)S(O)(=O)=O	0.04	121-57-3
76	Nc1ccc(cc1)[N+]([O-])=O	0.6	100-01-6
77	Nc1ccc(cc1Cl)-c1ccc(N)c(Cl)c1	2.26	91-94-1
78	Nc1ccc2C(=O)c3ccccc3C(=O)c2c1	1.57	117-79-3
79	Nc1ccc2c(O)cc(cc2c1)S(O)(=O)=O	0.38	87-02-5
80	Nc1ccc2cc(cc(O)c2c1)S(O)(=O)=O	0.16	90-51-7
81	Nc1ccc2ccccc2c1S(O)(=O)=O	0.78	81-16-3
82	Nc1cccc(Cl)c1	0.32	108-42-9
83	CC(C)(C)c1cc(c(O)c(c1)C(C)(C)C)-n1nc2ccccc2n1	3.74	3846-71-7
84	Nc1cccc(N)c1	0.8	108-45-2
85	Nc1cccc(O)c1	1.34	591-27-5
86	Nc1cccc(c1)N(CCO)CCO	0.08	UNK-07
87	Nc1cccc(c1)S(=O)(=O)c1cccc(N)c1	0.46	599-61-1
88	Nc1cccc(c1)[N+]([O-])=O	0.48	99-09-2
89	Nc1cccc2C(=O)c3ccccc3C(=O)c12	2.04	82-45-1
90	Nc1cccc2c(N)cccc12	0.46	2243-62-1
91	Nc1cccc2cccc(N)c12	0.75	479-27-6
92	Nc1cccc2ccccc12	1.43	134-32-7
93	Nc1ccccc1	0.31	62-53-3
94	CC(C)(C)c1cc(c(O)c(c1)C(C)(C)C)C(C)(C)C	4.14	732-26-3
95	Nc1ccccc1-c1ccccc1	1.42	90-41-5
96	Nc1ccccc1Cl	0.91	95-51-2
97	Nc1ccccc1[N+]([O-])=O	0.82	88-74-4
98	Nc1ccccn1	1.04	504-29-0
99	Nc1cccnc1	-0.19	462-08-8
100	Nc1ccncc1	0.65	504-24-5
101	Nc1nc(N)nc(N)n1	0.58	108-78-1
102	Nc1nccs1	0.06	96-50-4
103	BrCCCCCCCCCCBr	2.06	4101-68-2
104	CC(C)(C)c1cc(cc(c1)C(C)(C)C)C(C)(C)C	4.37	1460-02-2
105	Nc1nnc[nH]1	0.24	61-82-5
106	O(c1ccccc1)c1ccccc1	2.54	101-84-8
107	O=C(NC1CCCCC1)NC1CCCCC1	0.1	2387-23-7
108	O=C(ON=C1C=CC(C=C1)=NOC(=O)c1ccccc1)c1ccccc1	0.62	120-52-5
109	CC(C)(C)c1cc(cc(c1O)C(C)(C)C)-c1ccccc1	3.94	2668-47-5
110	O=C(c1ccccc1)c1ccccc1	0.91	119-61-9
111	O=C1C(Nc2ccccc12)=C1Nc2ccccc2C1=O	0.4	482-89-3
112	O=C1C=CC(C=C1)=Nc1ccccc1	1.3	184908
113	O=C1CCCCC1C1=CCCCC1	0.6	1502-22-3
114	O=C1CCCCCCCCCCCN1	0.28	947-04-6
115	O=C1NC(=O)C(N1)(c1ccccc1)c1ccccc1	0.54	57-41-0
116	O=C1NC(=O)c2ccccc12	1.14	85-41-6
117	O=C1c2ccccc2-c2cccc3cccc1c23	2.12	82-05-3
118	O=C1c2ccccc2C(=O)c2c1ccc1ccccc21	1.63	2498-66-0
119	O=C=Nc1ccc(Cc2ccc(cc2)N=C=O)cc1	2.35	101-68-8
120	O=NN(c1ccccc1)c1ccccc1	1.48	86-30-6
121	O=Nc1c(O[Co](Oc2ccc3ccccc3c2N=O)Oc2ccc3ccccc3c2N=O)ccc2ccccc12	1.79	26076-28-8
122	O=P(Oc1ccccc1)(Oc1ccccc1)Oc1ccccc1	2.4	115-86-6
123	O=S1(=O)CCCC1	0.61	126-33-0
124	CC(C)(C)c1ccc(O)c(c1)C(C)(C)C	2.45	96-76-4
125	O=c1[nH]c(=O)[nH]c(=O)[nH]1	-0.65	108-80-5
126	O=c1ccc(=O)[nH][nH]1	-0.2	123-33-1
127	OC(=O)C(Br)C(Br)C(O)=O	0.62	526-78-3
128	OC(=O)C(Cl)(Cl)Cl	0.03	21348-16-3
129	OC(=O)C(F)(F)C(F)(F)C(F)(F)C(F)(F)C(F)(F)C(F)(F)C(F)(F)C(F)(F)C(F)(F)C(F)(F)C(F)(F)C(F)(F)C(F)(F)C(F)(F)C(F)(F)C(F)(F)C(F)(F)F	2.66	16517-11-6
130	OC(=O)C(F)(F)C(F)(F)C(F)(F)C(F)(F)C(F)(F)C(F)(F)C(F)(F)C(F)(F)C(F)(F)C(F)(F)C(F)(F)C(F)(F)C(F)(F)C(F)(F)C(F)(F)F	3.76	67905-19-5
131	OC(=O)C(F)(F)C(F)(F)C(F)(F)C(F)(F)C(F)(F)C(F)(F)C(F)(F)C(F)(F)C(F)(F)C(F)(F)C(F)(F)C(F)(F)C(F)(F)F	4.4	376-06-7
132	OC(=O)C(F)(F)C(F)(F)C(F)(F)C(F)(F)C(F)(F)C(F)(F)C(F)(F)C(F)(F)C(F)(F)C(F)(F)C(F)(F)F	4.36	307-55-1
133	OC(=O)C(F)(F)C(F)(F)C(F)(F)C(F)(F)C(F)(F)C(F)(F)C(F)(F)C(F)(F)C(F)(F)C(F)(F)F	3.54	2058-94-8
134	CC(C)(C)c1ccc(O)cc1	1.83	98-54-4
135	OC(=O)C(F)(F)C(F)(F)C(F)(F)C(F)(F)C(F)(F)C(F)(F)C(F)(F)F	0.98	335-67-1
136	OC(=O)C(F)(F)OC(F)(F)C(F)(F)OC(F)(F)C(F)(F)F	0.76	2-4059
137	OC(=O)C(O)(c1ccccc1)c1ccccc1	0.26	76-93-7
138	OC(=O)C1C(C(O)=O)C2(Cl)C(Cl)=C(Cl)C1(Cl)C2(Cl)Cl	0.32	115-28-6
139	OC(=O)C1CC=CCC1C(O)=O	0.3	88-98-2
140	OC(=O)C1CCCCC1C(O)=O	0.3	610-09-3
141	CC(C)(C)c1ccc(OP(=O)(Oc2ccccc2)Oc2ccccc2)cc1	3.2	UNK-19
142	OC(=O)CN(CC(O)=O)CC(O)=O	1.75	139-13-9
143	OC(=O)CN(CCN(CC(O)=O)CC(O)=O)CC(O)=O	1.08	60-00-4
144	OC(=O)CNCP(O)(O)=O	1.35	1071-83-6
145	OC(=O)COc1ccc(Cl)cc1Cl	0.5	94-75-7
146	OC(=O)Cc1cccc2ccccc12	0.29	86-87-3
147	OC(=O)c1[nH]n(-c2ccc(cc2)S(O)(=O)=O)c(=O)c1N=Nc1ccc(cc1)S(O)(=O)=O	-0.03	1934-21-0
148	OC(=O)c1c(Cl)ccc(Cl)c1Cl	0.54	50-31-7
149	CC(C)(C)c1ccc(cc1)C(O)=O	0.34	98-73-7
150	OC(=O)c1c(Cl)cccc1Cl	-0.15	50-30-6
151	OC(=O)c1cc2ccccc2cc1O	0.46	92-70-6
152	OC(=O)c1ccc(Cl)c(Cl)c1	0.36	51-44-5
153	OC(=O)c1ccc(Cl)c2c(Cl)ccc(C(O)=O)c12	-0.01	7267-11-0
154	OC(=O)c1ccc(Cl)cc1	1.08	74-11-3
155	OC(=O)c1ccc(nc1)C(O)=O	0.56	100-26-5
156	OC(=O)c1ccc2cc(ccc2c1)C(O)=O	0.64	1141-38-4
157	OC(=O)c1cccc(c1)[N+]([O-])=O	0.85	121-92-6
158	CC(C)(C)c1ccc2C(=O)c3ccccc3C(=O)c2c1	2.48	84-47-9
159	OC(=O)c1cccc(c1C(O)=O)[N+]([O-])=O	0.71	603-11-2
160	OC(=O)c1ccccc1	0.93	65-85-0
161	OC(=O)c1ccccc1Cl	1	118-91-2
162	OC(C(F)(F)F)C(F)(F)F	0.3	920-66-1
163	OC(c1ccc(Cl)cc1)(c1ccc(Cl)cc1)C(Cl)(Cl)Cl	3.79	115-32-2
164	OC(c1ccccc1)c1ccc(Cl)cc1	1.82	119-56-2
165	OCC(CO)(CBr)CBr	0.17	3296-90-0
166	CC(C)(C)c1ccccc1O	1.94	88-18-6
167	OCC(CO)(CO)CO	-0.04	115-77-5
168	OCC(CO)(CO)COCC(CO)(CO)CO	0.31	126-58-9
169	OCC(F)(F)C(F)(F)C(F)(F)C(F)(F)C(F)(F)C(F)(F)C(F)(F)C(F)(F)C(F)(F)C(F)F	3.36	307-70-0
170	OCC(F)(F)C(F)(F)C(F)(F)C(F)(F)C(F)(F)C(F)F	1.36	335-99-9
171	OCC(F)(F)C(F)(F)C(F)(F)C(F)F	0.97	355-80-6
172	OCC(O)c1ccccc1Cl	0.4	59365-60-5
173	OCCC(F)(F)C(F)(F)C(F)(F)C(F)(F)C(F)(F)C(F)(F)C(F)(F)C(F)(F)F	2.76	678-39-7
174	OCCN(CCO)CCO	0.1	102-71-6
175	Brc1c(Br)c(Br)c(Br)c(Br)c1Br	2.99	87-82-1
176	OCCN(CCO)c1nc(Nc2ccc(cc2)S(O)(=O)=O)nc(Nc2ccc(C=Cc3ccc(Nc4nc(Nc5cccc(c5)S(O)(=O)=O)nc(n4)N(CCO)CCO)cc3S(O)(=O)=O)c(c2)S(O)(=O)=O)n1	0.1	UNK-12
177	OCCn1c(=O)n(CCO)c(=O)n(CCO)c1=O	0.2	839-90-7
178	OCc1c(Cl)cccc1Cl	0.39	15258-73-8
179	OCc1cc(Cl)cc(Cl)c1Cl	3.09	54135-81-8
180	OCc1ccc(Cl)c(Cl)c1	0.45	1805-32-9
181	OCc1cccc(Cl)c1	1.3	873-63-2
182	ON(N=O)C1CCCCC1	0.44	4883-72-1
183	OP(=O)c1ccccc1	0.29	1779-48-2
184	OP(O)(=O)OCC(Cl)(Cl)Cl	0.08	306-52-5
185	OS(=O)(=O)C(F)(F)C(F)(F)C(F)(F)C(F)(F)C(F)(F)C(F)(F)C(F)(F)C(F)(F)F	2.93	2795-39-3
186	OS(=O)(=O)C(F)(F)C(F)(F)C(F)(F)C(F)(F)C(F)(F)C(F)(F)F	2.61	3871-99-6
187	OS(=O)(=O)c1c(Cc2ccc3ccccc3c2S(O)(=O)=O)ccc2ccccc12	0.44	26545-58-4
188	OS(=O)(=O)c1cc(Cl)ccc1Oc1ccc(Cl)cc1NC(=O)Nc1ccc(Cl)c(Cl)c1	1.87	24019-05-4
189	OS(=O)(=O)c1cc(Nc2nc(Nc3ccccc3)nc(n2)N2CCOCC2)ccc1C=Cc1ccc(Nc2nc(Nc3ccccc3)nc(n2)N2CCOCC2)cc1S(O)(=O)=O	1.12	16090-02-1
190	OS(=O)(=O)c1cc(ccc1Cl)[N+]([O-])=O	0.48	946-30-5
191	OS(=O)(=O)c1cc2C=CC(=O)C(=NNc3ccc(c4ccccc34)S(O)(=O)=O)c2c(c1)S(O)(=O)=O	0.24	2611-82-7
192	OS(=O)(=O)c1ccc(C=C)cc1	0.1	2695-37-6
193	OS(=O)(=O)c1cccc(c1)[N+]([O-])=O	0.7	127-68-4
194	O[Si](c1ccccc1)(c1ccccc1)c1ccccc1	2.82	791-31-1
195	CC(C)(CC(=C)c1ccccc1)c1ccccc1	3.58	6362-80-7
196	O[Sn](c1ccccc1)(c1ccccc1)c1ccccc1	3.78	76-87-9
197	Oc1c(Br)c(Br)c(Br)c(Br)c1Br	0.79	608-71-9
198	Oc1c(Br)cc(Br)cc1Br	2.71	118-79-6
199	Oc1c(Br)cc(cc1Br)C#N	1.25	1689-84-5
200	Oc1c(Cl)c(Cl)c(Cl)c(Cl)c1Cl	2.45	87-86-5
201	Oc1c(Cl)c(Cl)cc(Cl)c1Cl	2.15	935-95-5
202	Oc1c(Cl)cc(Cl)c(Cl)c1Cc1c(O)c(Cl)cc(Cl)c1Cl	2.07	70-30-4
203	Oc1c(Cl)cc(Cl)c(Cl)c1Cl	1.98	58-90-2
204	Oc1c(Cl)cc(Cl)c2ccccc12	1.18	2050-76-2
205	Oc1c(Cl)cc(Cl)cc1Cl	1.94	88-06-2
206	CC(C)(CO)CO	0.16	126-30-7
207	Oc1c(Cl)cc(Cl)cc1[N+]([O-])=O	1.32	609-89-2
208	Oc1c(Cl)cccc1Cl	1.08	87-65-0
209	Oc1c(cc(cc1[N+]([O-])=O)[N+]([O-])=O)[N+]([O-])=O	0.34	88-89-1
210	Oc1c(cccc1C1CCCCC1)C1CCCCC1	3.02	4821-19-6
211	Oc1c(nc2ccccc2c1Br)C1C(=O)c2ccccc2C1=O	1.08	10319-14-9
212	Oc1cc(Cl)c(Br)cc1Cl	2.22	1940-42-7
213	Oc1cc(Cl)c(Cl)cc1Cl	2.73	95-95-4
214	Oc1cc(Cl)cc(Cl)c1	1.91	591-35-5
215	Oc1cc(Cl)ccc1Cl	1.2	583-78-8
216	Oc1cc(Cl)ccc1Oc1ccc(Cl)cc1Cl	1.72	3380-34-5
217	Oc1cc(cc2cc(NC(=O)Nc3ccc4c(O)cc(cc4c3)S(O)(=O)=O)ccc12)S(O)(=O)=O	-0.23	20324-87-2
218	Oc1cc2ccc(cc2cc1S(O)(=O)=O)S(O)(=O)=O	0.11	135-51-3
219	Oc1cc2ccccc2cc1C(=O)Nc1ccccc1	0.77	92-77-3
220	Oc1ccc(Br)cc1	1.17	106-41-2
221	Oc1ccc(Br)cc1Br	1.45	615-58-7
222	Oc1ccc(Cc2ccc(O)cc2)cc1	1.08	620-92-8
223	Oc1ccc(Cc2ccccc2)cc1	1.42	101-53-1
224	Oc1ccc(Cl)c(Cl)c1	1.77	95-77-2
225	CC(C)(O)C(Cl)(Cl)Cl	0.26	57-15-8
226	Oc1ccc(Cl)cc1	1.42	106-48-9
227	Oc1ccc(Cl)cc1Cc1cc(Cl)ccc1O	2.1	97-23-4
228	Oc1ccc(Cl)cc1Cl	1.74	120-83-2
229	Oc1ccc(Nc2ccccc2)c2C(=O)c3c(C(=O)c12)c(O)ccc3[N+]([O-])=O	1.29	12217-77-5
230	Oc1ccc(c2ccccc12)S(O)(=O)=O	1.11	6099-57-6
231	Oc1ccc(cc1)-c1ccc(O)cc1	1.52	92-88-6
232	Oc1ccc(cc1)-c1ccccc1	1.66	92-69-3
233	Oc1ccc(cc1)C#N	0.91	767-00-0
234	CC(C)(OOC(C)(C)c1ccccc1)c1ccccc1	2.72	80-43-3
235	Oc1ccc(cc1)C1(CCCCC1)c1ccc(O)cc1	1.6	843-55-0
236	Oc1ccc(cc1)S(=O)(=O)c1ccc(O)cc1	-0.18	80-09-1
237	Oc1ccc(cc1)[N+]([O-])=O	0.71	100-02-7
238	Oc1ccc(cc1[N+]([O-])=O)[N+]([O-])=O	0.57	51-28-5
239	Oc1ccc2cc(cc(c2c1)S(O)(=O)=O)S(O)(=O)=O	0	842-18-2
240	Oc1cccc(Br)c1	1.03	591-20-8
241	Oc1cccc(Cl)c1	1.12	108-43-0
242	Oc1cccc(Cl)c1Cl	1.31	576-24-9
243	Oc1cccc(c1)[N+]([O-])=O	1.4	554-84-7
244	Oc1cccc2C(=O)C(C=Cc12)=NNc1cc(Cl)cc(c1O)S(O)(=O)=O	0.39	3618-60-8
245	CC(C)(c1cc(Br)c(O)c(Br)c1)c1cc(Br)c(O)c(Br)c1	2.43	79-94-7
246	Oc1cccc2C(=O)c3ccccc3C(=O)c12	2.32	129-43-1
247	Oc1cccc2cccnc12	1.12	148-24-3
248	Oc1ccccc1	1.24	108-95-2
249	Oc1ccccc1Br	1.52	95-56-7
250	Oc1ccccc1C(=O)OC1CCCCC1	2.88	25485-88-5
251	Oc1ccccc1Cl	1.36	95-57-8
252	Oc1ccccc1[N+]([O-])=O	1.34	88-75-5
253	S(Sc1ccc2ccccc2c1)c1ccc2ccccc2c1	0.34	5586-15-2
254	S(Sc1ccccc1)c1ccccc1	0.9	882-33-7
255	CC(C)(c1cc(Br)c(OCC(Br)CBr)c(Br)c1)c1cc(Br)c(OCC(Br)CBr)c(Br)c1	1.68	21850-44-2
256	S(Sc1nc2ccccc2s1)c1nc2ccccc2s1	1.28	120-78-5
257	S=C(NC1CCCCC1)NC1CCCCC1	0.64	1212-29-9
258	S=C(SSSSC(=S)N1CCCCC1)N1CCCCC1	1.12	120-54-7
259	S=C1NCCN1	0.26	96-45-7
260	S=C=S	1.29	75-15-0
261	S=c1[nH]c2ccccc2[nH]1	0.41	583-39-1
262	S=c1[nH]c2ccccc2s1	0.4	149-30-4
263	Brc1c(Br)c(Br)c(Oc2c(Br)c(Br)c(Br)c(Br)c2Br)c(Br)c1Br	1.17	1163-19-5
264	CC(C)(c1cc(Br)c(OCCO)c(Br)c1)c1cc(Br)c(OCCO)c(Br)c1	2.17	4162-45-2
265	[O-][N+](=O)N1CN(CN(C1)[N+]([O-])=O)[N+]([O-])=O	0.3	121-82-4
266	CC(C)(c1ccc(O)cc1)c1ccc(O)cc1	1.39	80-05-7
267	[O-][N+](=O)c1c(Cl)c(Cl)c(Cl)c(Cl)c1Cl	2.48	82-68-8
268	[O-][N+](=O)c1c(Cl)c(Cl)cc(Cl)c1Cl	3.26	117-18-0
269	[O-][N+](=O)c1c(Cl)cc(Cl)cc1Cl	2.71	18708-70-8
270	[O-][N+](=O)c1cc(Cl)c(Cl)c(Cl)c1Cl	1.87	879-39-0
271	[O-][N+](=O)c1cc(Cl)c(Cl)cc1Cl	1.83	89-69-0
272	[O-][N+](=O)c1cc(Cl)c(N=Nc2ccc(cc2)N(CCC#N)CCC#N)c(Cl)c1	1.63	71767-67-4
273	[O-][N+](=O)c1cc(Cl)cc(Cl)c1	2.23	618-62-2
274	[O-][N+](=O)c1cc(Cl)ccc1Cl	2.04	89-61-2
275	[O-][N+](=O)c1cc(ccc1Nc1ccccc1)S(=O)(=O)Nc1ccccc1	1.61	5124-25-4
276	[O-][N+](=O)c1ccc(Cl)c(Cl)c1	1.98	99-54-7
277	[O-][N+](=O)c1ccc(Cl)c(Cl)c1Cl	2.19	17700-09-3
278	[O-][N+](=O)c1ccc(Cl)c(c1)[N+]([O-])=O	1.13	97-00-7
279	[O-][N+](=O)c1ccc(Cl)cc1	1.53	100-00-5
280	[O-][N+](=O)c1ccc(Cl)cc1C(F)(F)F	1.96	118-83-2
281	[O-][N+](=O)c1ccc(Cl)cc1Cl	2.06	611-06-3
282	[O-][N+](=O)c1ccc(Oc2c(Cl)cc(Cl)cc2Cl)cc1	3.31	1836-77-7
283	[O-][N+](=O)c1ccc(Oc2ccc(Cl)cc2Cl)cc1	3.68	1836-75-5
284	CC(C)(c1ccc(OCCO)cc1)c1ccc(OCCO)cc1	1.18	901-44-0
285	[O-][N+](=O)c1ccc(cc1)N=Nc1ccc(cc1)N(CCOC(=O)c1ccccc1)CCC#N	0.94	40690-89-9
286	[O-][N+](=O)c1ccc2nc[nH]c2c1	0.33	94-52-0
287	[O-][N+](=O)c1cccc(Cl)c1	1.89	121-73-3
288	[O-][N+](=O)c1cccc(Cl)c1Cl	2.15	3209-22-1
289	[O-][N+](=O)c1ccccc1	0.67	98-95-3
290	[O-][N+](=O)c1ccccc1Cl	1.88	88-73-3
291	[O-][N+](=O)c1ccccc1[N+]([O-])=O	1.02	25154-54-5
292	[O-][n+]1ccccc1S[Zn]Sc1cccc[n+]1[O-]	2.32	13463-41-7
293	CC(C)(c1ccccc1)c1ccc(Nc2ccc(cc2)C(C)(C)c2ccccc2)cc1	1.92	10081-67-1
294	c1c([nH]c2ccccc12)-c1ccccc1	2.56	948-65-2
295	c1cc2ccc3cccc4ccc(c1)c2c34	2.87	129-00-0
296	c1ccc(cc1)-c1ccc(cc1)-c1ccccc1	1.84	26140-60-3
297	c1ccc(cc1)-c1cccc(c1)-c1ccccc1	1.33	92-06-8
298	c1ccc(cc1)-c1ccccc1	2.77	92-52-4
299	CC(C)(c1ccccc1)c1ccc(O)cc1	2.28	599-64-4
300	c1ccc(cc1)-c1ccccc1-c1ccccc1	3.29	84-15-1
301	c1ccc(cc1)[Sn](c1ccccc1)(c1ccccc1)c1ccccc1	4.26	595-90-4
302	c1ccc-2c(c1)-c1cccc3cccc-2c13	3.55	206-44-0
303	c1ccc2c(c1)[nH]c1ccccc21	2.19	86-74-8
304	c1ccc2c(c1)cc1ccc3cccc4ccc2c1c34	2.83	50-32-8
305	c1ccc2c(c1)ccc1c3ccccc3ccc21	2.4	218-01-9
306	c1ccc2c(c1)ccc1ccccc21	3.3	85-01-8
307	c1ccc2c(c1)ccc1nc3c(ccc4ccccc34)cc21	2.03	226-36-8
308	CC(C)=C1CCC2C(CCC3C2(C)CCCC3(C)C(O)=O)=C1	2.11	471-77-2
309	c1ccc2c(c1)oc1ccccc21	3.22	132-64-9
310	c1ccc2c(c1)sc1ccccc21	3.17	132-65-0
311	c1ccc2cc3c(ccc4ccccc34)cc2c1	2.54	56-55-3
312	c1ccc2cc3ccccc3cc2c1	3.26	120-12-7
313	c1ccc2ccccc2c1	2.45	91-20-3
314	c1ccc2n[nH]nc2c1	0.83	95-14-7
315	c1ccc2nc3ccccc3cc2c1	2.5	260-94-6
316	c1ccc2ncccc2c1	0.49	91-22-5
317	c1ccccc1	0.64	71-43-2
318	CC(C)=CC(C)(C)CC(C)(C)C	3.42	7756-94-7
319	c1ccoc1	0.5	110-00-9
320	c1ccsc1	0.86	110-02-1
321	c1nc2ccccc2s1	0.76	95-16-9
322	CC(C)=CC1C(C(=O)OC2CC(=O)C(CC=C)=C2C)C1(C)C	2.26	584-79-2
323	Brc1c(Br)c(Br)c(c(Br)c1Br)-c1c(Br)c(Br)c(Br)c(Br)c1Br	0.64	13654-09-6
324	CC(C)=CC=C(C)C	2.42	764-13-6
325	CC(C)C(C(=O)OC(C#N)c1cccc(Oc2ccccc2)c1)c1ccc(Cl)cc1	2.82	66230-04-4
326	CC(C)C(O)C(C)(C)CO	-0.1	144-19-4
327	CC(C)C12CCC(C)(C=C1)C(C2C(O)=O)C(O)=O	0.1	UNK-15
328	CC(C)C1=CC2=C(CC1)C1(C)CCCC(C)(C1CC2)C(O)=O	1.4	1945-53-5
329	CC(C)C1=CC2=CCC3C(C)(CCCC3(C)C(O)=O)C2CC1	1.91	514-10-3
330	CC(C)C1CCC(C)CC1O	0.89	1490-04-6
331	CC(C)C1CCC2CCCCC2C1	3.81	54352-93-1
332	CC(C)CC(C)(C)C	2.78	540-84-1
333	Brc1cc(Br)c(Br)c(Oc2ccc(Br)c(Br)c2Br)c1	3.14	36483-60-0
334	CC(C)CCCCCCCOC(=O)c1ccccc1C(=O)OCCCCCCCC(C)C	1.01	26761-40-0
335	CC(C)CCCCCCCOP(=O)(Oc1ccccc1)Oc1ccccc1	2.63	29761-21-5
336	CC(C)CCCCCCc1ccc(O)cc1	2.51	84852-15-3
337	CC(C)CCOCCC(C)C	2.29	544-01-4
338	CC(C)CN1CCOCC1	0.23	10315-98-7
339	CC(C)COc1ccc2ccccc2c1	2.9	2173-57-1
340	CC(C)NC(=O)N1CC(=O)N(C1=O)c1cc(Cl)cc(Cl)c1	2.48	36734-19-7
341	CC(C)Nc1ccc(NC(C)C)c2C(=O)c3ccccc3C(=O)c12	3.85	14233-37-5
342	Brc1cc(Br)c(Br)cc1Br	3.66	636-28-2
343	CC(C)OC(=O)C(C(=O)OC(C)C)=C1SCCS1	1.57	50512-35-1
344	CC(C)OC(=O)C(C(=O)OC(C)C)=C1SCCS1=O	-0.79	52303-69-2
345	CC(C)OC(=O)C(Cl)(Cl)C(=O)OC(C)C	-0.21	174300-34-6
346	CC(C)OC(=O)C(Cl)C(=O)OC(C)C	-0.68	nd
347	CC(C)OP(=O)(OC(C)C)SCc1ccccc1	0.95	26087-47-8
348	CC(C)Oc1cc(c(Cl)cc1Cl)-n1nc(oc1=O)C(C)(C)C	2.86	19666-30-9
349	CC(C)Oc1cccc(NC(=O)c2ccccc2C(F)(F)F)c1	1.31	66332-96-5
350	CC(C)[N+]([O-])=O	0.86	79-46-9
351	Brc1cc(Br)c(c(Br)c1)-c1c(Br)cc(Br)cc1Br	4.66	36355-01-8
352	CC(C)c1cc(C(C)C)c2cccc(C(C)C)c2c1	3.91	35860-37-8
353	CC(C)c1cc2CCC3C(C)(CCCC3(C)c2cc1Cl)C(O)=O	1.67	65310-45-4
354	CC(C)c1cc2ccccc2c(c1C(C)C)S(O)(=O)=O	0.46	1322-93-6
355	CC(C)c1ccc(C)cc1O	1.48	89-83-8
356	CC(C)c1ccc(N)cc1	1.03	99-88-7
357	CC(C)c1ccc(cc1)C(C)C	3.26	25321-09-9
358	CC(C)c1ccc2c(CCC3C(C)(CCCC23C)C(O)=O)c1	2.26	1740-19-8
359	CC(C)c1ccc2c(CCC3C(C)(CCCC23C)C(O)=O)c1Cl	1.57	65281-76-7
360	Brc1cc(Br)c(c(Br)c1)-c1ccccc1	3.87	59080-33-0
361	CC(C)c1ccc2ccccc2c1	4.11	2027-17-0
362	CC(C)c1ccc2ccccc2c1C(C)C	3.45	38640-62-9
363	CC(C)c1cccc(C(C)C)c1O	1.54	2078-54-8
364	CC(C)c1cccc(C)c1	2.73	535-77-3
365	CC(C)c1cccc(c1)C(C)C	3.1	99-62-7
366	CC(C)c1cccc2ccccc12	2.88	29253-36-9
367	CC(C)c1ccccc1	1.55	98-82-8
368	CC(C)c1ccccc1C(C)C	2.14	577-55-9
369	BrC(Br)C(Br)Br	0.74	79-27-6
370	Brc1cc(Br)cc(Br)c1	3.84	626-39-1
371	CC(C)c1ccccc1OP(=O)(Oc1ccccc1C(C)C)Oc1ccccc1C(C)C	1.5	26967-76-0
372	CC(C)c1nc(=O)cc(C)[nH]1	0.14	2814-20-2
373	CC(CC(C)(C)C)CC(C)(C)C	3.1	13475-82-6
374	CC(CC(C)(C)C)CC(C)(C)CC(C)(C)C	1.92	909554
375	CC(CC(O)=O)CC(C)(C)C	0.54	512345
376	CC(CCC(COS(O)(=O)=O)C(C)CC(C)(C)C)CC(C)(C)C	2.15	UNK-08
377	CC(CCO)CC(C)(C)C	0.86	3452-97-9
378	CC(CCl)OC(C)CCl	0.96	108-60-1
379	CC(CCl)OP(=O)(OC(C)CCl)OC(C)CCl	0.49	13674-84-5
380	Brc1ccc(Br)c(Br)c1	3.45	615-54-3
381	CC(CCl)OP(=O)(OCCOCCOP(=O)(OC(C)CCl)OC(C)CCl)OC(C)CCl	0.02	52186-00-2
382	CC(CO)OC(C)COCC(C)OC(C)COCC(C)OCC(O)COCC(C)OCC(C)OC(C)COCC(C)OC(C)CO	0.6	25791-96-2
383	CC(Cc1ccc(cc1)C(C)(C)C)C(O)=O	0.35	66735-04-4
384	CC(Cl)(Cl)C(O)=O	0.85	127-20-8
385	CC(Cl)(Cl)Cl	0.48	71-55-6
386	CC(Cl)CCl	0.57	78-87-5
387	CC(N)c1ccccc1	0.73	98-84-0
388	CC(O)CN(CC(C)O)CC(C)O	-0.73	122-20-3
389	CC(O)COC(C)COC(C)CO	0.23	24800-44-0
390	CC(O)COCC(C)O	0.49	110-98-5
391	CC(c1ccccc1)c1cc(C)ccc1C	2.92	6165-51-1
392	CC(c1ccccc1)c1ccc(O)c(C(C)c2ccccc2)c1C(C)c1ccccc1	2.42	25640-71-5
393	Brc1ccc(Br)c(c1)-c1cc(Br)ccc1Br	4.97	59080-37-4
394	CC(c1ccccc1)c1cccc(C)c1C	3.44	40766-31-2
395	CC1(C)C(C=C(Br)Br)C1C(=O)OC(C#N)c1cccc(Oc2ccccc2)c1	2.35	52918-63-5
396	CC1(C)C(C=C(Cl)Cl)C1C(=O)OC(C#N)c1cccc(Oc2ccccc2)c1	2.61	52315-07-8
397	CC1(C)C(C=C(Cl)Cl)C1C(=O)OCc1cccc(Oc2ccccc2)c1	2.7	61949-76-6
398	CC1(C)C2CC1C(C)(O)CC2	0.83	473-54-1
399	CC1(C)C2CCC(C2)C1=C	2.97	79-92-5
400	CC1(C)C2CCC1(C)C(=O)C2=Cc1ccccc1	2.5	15087-24-8
401	CC1(C)C2CCC1(C)C(C)(O)C2	1.48	2371-42-8
402	CC1(C)CC(N)CC(C)(CN)C1	0	2855-13-2
403	Brc1ccc(Br)cc1	2.34	106-37-6
404	CC1(C)CC(O)CC(C)(C)N1	0.26	2403-88-5
405	CC1(CCC2C(C1)=CCC1C2(C)CCCC1(C)C(O)=O)C=C	1.54	5835-26-7
406	CC1(CCC2C(CCC3C2(C)CCCC3(C)C(O)=O)=C1)C=C	1.8	127-27-5
407	CC1=CC(=O)CC(C)(C)C1	0.34	78-59-1
408	CC1=CC(C)(C)Nc2ccccc12	3.06	26780-96-1
409	CC1=CC2CC1C(C2C(O)=O)C(O)=O	0.74	50853-70-8
410	Brc1ccc(cc1)-c1ccc(Br)cc1	3.99	92-86-4
411	CC1C2CC(CC2C2CCCC(O)C2)C1(C)C	2.76	3407-42-9
412	CC1CC(C)(C)CC(C1)(OOC(C)(C)C)OOC(C)(C)C	3.98	6731-36-8
413	CC1CC(C)C(=O)C(C1)C(O)CC1CC(=O)NC(=O)C1	0.45	66-81-9
414	CC1CC(CC2CCC(N)C(C)C2)CCC1N	1.28	6864-37-5
415	Brc1cccc(Br)c1	2.8	108-36-1
416	CC1CCC(C(C1)C(O)=O)C(O)=O	0.38	57567-84-7
417	CC1CCC2C(C)(C)C3CC12CC(C(C)=O)=C3C	2.9	32388-55-9
418	CC1CCCC(C)N1	0.2	504-03-0
419	CC1CCCCC1	2.3	108-87-2
420	CC1OC(C)OC(C)O1	0.04	123-63-7
421	CC=C1CC2CC1C=C2	2.13	16219-75-3
422	CC=CC=CC=CC=CC1CC(=O)N(CCCCCC(O)=O)C1=O	1.71	1424148-99-1
423	CC=CCC=CCC=CCC=C	3.44	6842-15-5
424	CCC(=O)Nc1cc(ccc1N=Nc1ccc(cc1Cl)[N+]([O-])=O)N(CCOC(C)=O)CCOC(C)=O	0.73	61968-52-3
425	CCC(C)(C)c1cc(c(O)c(c1)C(C)(C)CC)-n1nc2ccccc2n1	3.2	25973-55-1
426	CCC(C)(C)c1ccc(O)c(c1)C(C)(C)CC	2.63	120-95-6
427	CCC(C)(C)c1ccccc1	3.18	2049-95-8
428	CCC(C)=NO	0.62	96-29-7
429	Brc1ccccc1	1.43	108-86-1
430	CCC(C)NC(C)CC	0.48	626-23-3
431	CCC(C)NC1CCC(CC2CCC(CC2)NC(C)CC)CC1	0.93	154279-60-4
432	CCC(C)c1cc(cc(c1O)-n1nc2ccccc2n1)C(C)(C)C	4.08	36437-37-3
433	CCC(C)c1cc(cc(c1O)[N+]([O-])=O)[N+]([O-])=O	0.36	88-85-7
434	CCC(C)c1ccc(O)cc1	1.35	99-71-8
435	CCC(C)c1ccc(OCC(O)CO)cc1	0.81	UNK-01
436	CCC(C)c1cccc(C(C)CC)c1O	2.54	5510-99-6
437	CCC(C)c1ccccc1O	1.49	89-72-5
438	CCC(C)c1ccccc1OC(=O)NC	0.6	3766-81-2
439	CCC(C)n1c(=O)[nH]c(C)c(Br)c1=O	0.51	314-40-9
440	CCC(CO)(CO)CO	0.81	77-99-6
441	CCC(Oc1ccc(cc1C(C)(C)CC)C(C)(C)CC)C(=O)Nc1ccc(NC(=O)C(F)(F)C(F)(F)C(F)(F)F)c(O)c1	0.29	346-10-1
442	CCC1(C(=O)NC(=O)NC1=O)c1ccccc1	0.7	50-06-6
443	CCC1CCC(CCC(O)=O)C1	0.88	61790-13-4
444	CCC1CCCCC1	3.42	1678-91-7
445	CCCC(C)CC(C)C	3.32	13987-01-4
446	BrC(Br)c1ccccc1OCC1CO1	0.61	30171-80-3
447	C(CN1CCOCC1)OCCN1CCOCC1	0.48	6425-39-4
448	CCCCC(CC)C(=O)OCC(COC(=O)C(CC)CCCC)(COC(=O)C(CC)CCCC)COC(=O)C(CC)CCCC	0.92	7299-99-2
449	C(Cc1ccccc1)Cc1ccncc1	1.83	2057-49-0
450	CCCCC(CC)CN1C(=O)C2C(C1=O)C1(CCC2(C)C=C1)C(C)C	3.15	13358-11-7
451	CCCCC(CC)COC(=O)CC(C(=O)OCC(CC)CCCC)S(O)(=O)=O	0.49	577-11-7
452	CCCCC(CC)COC(=O)c1ccc(C(=O)OCC(CC)CCCC)c(c1)C(=O)OCC(CC)CCCC	0.27	3319-31-1
453	CCCCC(CC)COC(=O)c1ccccc1C(=O)OCC(CC)CCCC	2.34	117-81-7
454	CCCCC(CC)COC=C	2.98	103-44-6
455	CCCCC(CC)COP(=O)(OCC(CC)CCCC)OCC(CC)CCCC	1.04	78-42-2
456	C(OCc1ccccc1)c1ccccc1	2.5	103-50-4
457	CCCCC(CC)COP(=O)(Oc1ccccc1)Oc1ccccc1	2.67	1241-94-7
458	CCCCC(CC)COP(O)(=O)CC(CC)CCCC	0.9	14802-03-0
459	CCCCC(CC)COP(O)(=O)OCC(CC)CCCC	0.62	298-07-7
460	CCCCCCCC=C	3.18	124-11-8
461	CCCCCCCCCCCC	2.38	112-40-3
462	CCCCCCCCCCCC(=O)Oc1c(Cl)c(Cl)c(Cl)c(Cl)c1Cl	2.33	3772-94-9
463	CCCCCCCCCCCC(O)=O	2.4	629-25-4
464	CCCCCCCCCCCCCCC	1.31	629-62-9
465	CCCCCCCCCCCCCCCC	1.64	544-76-3
466	C(c1ccccc1)c1ccccc1	2.97	101-81-5
467	CCCCCCCCCCCCCCCCC=CC(CC(O)=O)C(O)=O	0.22	28299-29-8
468	CCCCCCCCCCCCCCCCCC(=O)CCCCCCCCCCCCCCCCC	1.22	504-53-0
469	CCCCCCCCCCCCCCCCCC(=O)NCCNC(=O)CCCCCCCCCCCCCCCCC	0.54	110-30-5
470	CCCCCCCCCCCCCCCCCCCCCCCCCCCC(=O)OCCO	1.2	26787-65-5
471	CCCCCCCCCCCCCCCCCCNC(=O)C(O)C(O)C(O)C(O)CO	2.94	18375-66-1
472	CCCCCCCCCCCCCCCCCCNC(=O)N1CC1	1.46	3891-29-0
473	CCCCCCCCCCCCCCCCCCNC(=O)NCCCCCCCCCCCCCCCCCC	1.48	4051-66-5
474	CCCCCCCCCCCCCCCCCCOC(=O)CCc1cc(c(O)c(c1)C(C)(C)C)C(C)(C)C	1	2082-79-3
475	CCCCCCCCCCCCCCCCCCS	-0.04	2885-00-9
476	C1=Cc2cccc3cccc1c23	2.57	208-96-8
477	CCCCCCCCCCCCCCCC[N+](C)(C)C	2.85	57-09-0
478	CCCCCCCCCCCCCOC(=O)c1ccccc1C(=O)OCCCCCCCCCCCCC	1.17	119-06-2
479	CCCCCCCCCCCCCOP(Oc1ccccc1)Oc1ccccc1	1.54	60628-17-3
480	CCCCCCCCCCCCSCCC(=O)OCC(COC(=O)CCSCCCCCCCCCCCC)(COC(=O)CCSCCCCCCCCCCCC)COC(=O)CCSCCCCCCCCCCCC	1.38	29598-76-3
481	CCCCCCCCCCCCSP(=O)(SCCCCCCCCCCCC)SCCCCCCCCCCCC	0.09	UNK-13
482	C1C2CC3CC1CC(C2)C3	3.42	281-23-2
483	CCCCCCCCCCCCc1c(Oc2ccccc2S(O)(=O)=O)cccc1S(O)(=O)=O	0.84	28519-02-0
484	CCCCCCCCCCCCc1ccc(O)cc1	3.22	104-43-8
485	CCCCCCCCCCCCc1ccc(Oc2cc(ccc2S(O)(=O)=O)S(O)(=O)=O)cc1	1.1	63428-00-2
486	CCCCCCCCCCCCc1ccc(cc1)S(O)(=O)=O	1.44	25155-30-0
487	CCCCCCCCCCCCc1cccc(O)c1	2.87	27193-86-8
488	CCCCCCCCCCSSCCCCCCCCCC	1.15	10496-18-1
489	CCCCCCCCCC[N+](C)(C)CCCCCCCCCC	2.12	7173-51-5
490	CCCCCCCCCc1ccc(O)cc1	2.55	104-40-5
491	CCCCCCCCCc1cccc(O)c1CCCCCCCCC	2.29	1323-65-5
492	C1C=CC2C3CC(C=C3)C12	2.34	77-73-6
493	CCCCCCCCCc1ccccc1O	1.16	25154-52-3
494	CCCCCCCCN(CCCCCCCC)CCCCCCCC	1.93	1116-76-3
495	CCCCCCCCOc1ccc(C(=O)c2ccccc2)c(O)c1	2.01	1843-05-6
496	CCCCCCCCSCc1cc(C)c(O)c(CSCCCCCCCC)c1	1.7	110553-27-0
497	CCCCCCCC[Si](OCC)(OCC)OCC	3.24	2943-75-1
498	CCCCCCCCc1ccc(Nc2ccc(CCCCCCCC)cc2)cc1	0.58	101-67-7
499	CCCCCCCCc1ccc(O)cc1	2.16	1806-26-4
500	CCCCCCCCc1ccccc1Nc1ccccc1CCCCCCCC	1	26603-23-6
501	CCCCCCCOC(=O)c1ccccc1C(=O)OCCCCCCC	0.88	3648-21-3
502	C1C=CC2CC=CCC12	2.49	3048-65-5
503	CCCCCC[Si](O)(CCCCCC)CCCCCC	1.59	60782-58-3
504	CCCCCCc1ccc(cc1)-c1ccc(cc1)C#N	3.59	41122-70-7
505	CCCCCc1ccc2C(=O)c3ccccc3C(=O)c2c1	2.98	13936-21-5
506	CCCCCl	1.22	109-69-3
507	CCCCN(CCCC)CCCC	1.33	102-82-9
508	CCCCN(CCO)CCCC	1.14	102-81-8
509	CCCCNS(=O)(=O)c1ccccc1	0.54	3622-84-2
510	CCCCOC(=O)c1ccccc1C(=O)OCCCC	2.23	84-74-2
511	CCCCOC(=O)c1ccccc1C(=O)OCc1ccccc1	1.31	85-68-7
512	CCCCOCCCC	1.89	142-96-1
513	CCCCOCCN1C(O)c2c(C1=N)c(N)c1C(=O)c3ccccc3C(=O)c1c2N	0.62	61968-28-3
514	C1CC=CC(C1)c1ccc(cc1)C1CCC=CC1	4.17	61788-32-7
515	CCCCOCCOP(=O)(OCCOCCCC)OCCOCCCC	0.68	78-51-3
516	CCCCOP(=O)(OCCCC)OCCCC	1.27	126-73-8
517	CCCCOP(O)(=O)OCCCC	0.59	107-66-4
518	CCCCOc1ccccc1OCCCC	2.92	20367-35-5
519	CCCC[Si](C)(C)O[Si](C)(C)O[Si](C)(C)O[Si](C)(C)O[Si](C)(C)CCCOCCOC(=O)C(C)=C	2.5	1052075-57-6
520	CCCC[Sn++]CCCC	1.82	UNK-10
521	CCCC[Sn](=O)CCCC	1.55	818-08-6
522	CCCC[Sn](CCCC)(CCCC)CCCC	2.34	1461-25-2
523	CCCC[Sn](CCCC)(CCCC)O[Sn](CCCC)(CCCC)CCCC	4.05	56-35-9
524	C1CCC(CC1)N(Sc1nc2ccccc2s1)C1CCCCC1	2.5	4979-32-2
525	CCCC[Sn](CCCC)(CCCC)Oc1c(Cl)c(Cl)c(Cl)c(Cl)c1Cl	3.55	3644-38-0
526	CCCC[Sn](O)(CCCC)CCCC	3.92	1067-97-6
527	CCCCc1ccc(cc1)C(O)=O	0.88	20651-71-2
528	CCCCc1ccc2ccccc2c1S(O)(=O)=O	-0.36	25638-17-9
529	CCCN(CCC)c1c(cc(cc1[N+]([O-])=O)C(F)(F)F)[N+]([O-])=O	3.51	1582-09-8
530	C1CCC(CC1)N=C=NC1CCCCC1	0.09	538-75-0
531	CCC[N+](CCC)(CCC)CCC	-0.04	1941-30-6
532	CCCc1cc(=O)[nH]c(=S)[nH]1	1.09	51-52-5
533	CCN(CC)C(=O)SCc1ccc(Cl)cc1	2.27	28249-77-6
534	CCN(CC)C(=O)c1cccc(C)c1	0.38	134-62-3
535	CCN(CC)CC	0.2	121-44-8
536	C1CCC2CCCCC2C1	3.3	493-01-6
537	CCN(CC)CCO	0.29	100-37-8
538	CCN(CC)c1cc2[o+]c3cc(N(CC)CC)c(C)cc3c(-c3ccc(cc3S(O)(=O)=O)S(O)(=O)=O)c2cc1C	0.24	3520-42-1
539	CCN(CC)c1ccc(C(=O)c2ccccc2C(O)=O)c(O)c1	0.2	5809-23-4
540	CCN(CC)c1ccc2c(-c3ccccc3C(O)=O)c3ccc(cc3[o+]c2c1)N(CC)CC	-0.24	81-88-9
541	CCN(CC)c1ccc2c(Oc3cc(ccc3C22OC(=O)c3ccccc23)N(CC)CC)c1	0.46	509-34-2
542	CCN(CC)c1ccccc1	2.01	91-66-7
543	CCN(CCO)CCO	0.54	139-87-7
544	CCN(Cc1cccc(c1)S(O)(=O)=O)c1ccc(cc1)[C+](c1ccc(cc1)N(C)C)c1ccc(cc1)N(CC)Cc1cccc(c1)S(O)(=O)=O	0.57	1694-09-3
545	CCN(Cc1cccc(c1)S(O)(=O)=O)c1ccc(cc1)[C+](c1ccc(cc1)N(CC)Cc1cccc(c1)S(O)(=O)=O)c1ccccc1S(O)(=O)=O	0.28	2650-18-2
546	CCN=C=NCCCN(C)C	0.18	1892-57-5
547	C1CCC=CC1	1.62	110-83-8
548	CCNc1ccc(C)cc1	0.38	622-57-1
549	CCNc1cccc2ccccc12	2.32	118-44-5
550	CCNc1ccccc1	1.01	103-69-5
551	CCNc1nc(Cl)nc(NC(C)C)n1	0.9	1912-24-9
552	CCNc1nc(Cl)nc(NCC)n1	1.11	122-34-9
553	CCNc1nc(NC(C)C)nc(SC)n1	1.04	834-12-8
554	C1CCCCC1	1.94	110-82-7
555	CCOC(=O)C(C)OC(=O)c1cc(Oc2ccc(cc2Cl)C(F)(F)F)ccc1[N+]([O-])=O	2.48	77501-63-4
556	CCOC(=O)C(O)(c1ccc(Cl)cc1)c1ccc(Cl)cc1	2.71	510-15-6
557	CCOC(=O)C(SP(=S)(OC)OC)c1ccccc1	1.56	61391-87-5
558	CCOC(=O)CC(SP(=O)(OC)OC)C(=O)OCC	-0.4	1634-78-2
559	CCOC(=O)CC(SP(=S)(OC)OC)C(=O)OCC	1.04	121-75-5
560	CCOC(N)=O	0.36	51-79-6
561	CCOCC	0.6	60-29-7
562	C1CCCCCCCCCCC1	3.98	294-62-2
563	CCOP(=O)(OCC)OCC	0	78-40-0
564	CCOP(=O)(OCC)Oc1cc(C)nc(n1)C(C)C	-1	962-58-3
565	CCOP(=O)(OCC)SCc1ccccc1	1.24	13286-32-3
566	CCOP(=O)(Oc1ccc(cc1)[N+]([O-])=O)c1ccccc1	0.69	2012-00-2
567	CCOP(=O)(Sc1ccccc1)Sc1ccccc1	1.45	17109-49-8
568	CCOP(=S)(NC(C)C)Oc1ccccc1C(=O)OC(C)C	2	25311-71-1
569	CCOP(=S)(NC(C)CC)Oc1cc(C)ccc1[N+]([O-])=O	2.42	36335-67-8
570	CCOP(=S)(OCC)ON=C(C#N)c1ccccc1	2.96	14816-18-3
571	CCOP(=S)(OCC)Oc1cc(C)nc(n1)C(C)C	1.76	333-41-5
572	CCOP(=S)(OCC)Oc1cc(on1)-c1ccccc1	2.63	18854-01-8
573	CCOP(=S)(OCC)Oc1ccc(=O)n(n1)-c1ccccc1	0.72	119-12-0
574	CCOP(=S)(OCC)Oc1ccc(cc1)[N+]([O-])=O	1.99	56-38-2
575	CCOP(=S)(OCC)Oc1nc(Cl)c(Cl)cc1Cl	2.82	2921-88-2
576	CCOP(=S)(OCC)SCCS(=O)(=O)CC	0.68	218178
577	CCOP(=S)(OCC)SCCS(=O)CC	0	218210
578	CCOP(=S)(OCC)SCCSCC	2.22	298-04-4
579	CCOP(=S)(OCC)SCSC(C)(C)C	2.42	13071-79-9
580	C1CCc2ccccc2C1	2.5	119-64-2
581	CCOP(=S)(Oc1ccc(Cl)cc1Cl)c1ccccc1	4.16	3792-59-4
582	CCOP(=S)(Oc1ccc(cc1)[N+]([O-])=O)c1ccccc1	2.96	2104-64-5
583	CCOP(S)(=S)OCC	0.2	298-06-6
584	CCO[Si](CCCN)(OCC)OCC	0.22	919-30-2
585	CCOc1ccc(N)cc1	0.52	156-43-4
586	CCOc1ccc(NC(C)=O)cc1	1.48	62-44-2
587	CCOc1ccc2NC(C)(C)C=C(C)c2c1	1.84	91-53-2
588	C1CN2CCN1CC2	0.85	280-57-9
589	CCSC(=O)N1CCCCCC1	1.41	2212-67-1
590	CCSSCC	1.69	110-81-6
591	CCc1c(Br)c(Br)c(Br)c(Br)c1Br	2.52	85-22-3
592	CCc1cc(c(O)c(c1)C(C)(C)C)C(C)(C)C	3.51	4130-42-1
593	CCc1cc2ccccc2c2ccccc12	2.67	3674-75-7
594	CCc1ccc(CC)cc1	2.71	105-05-5
595	CCc1ccc(cc1)-c1ccc(CC)cc1	3.76	28575-17-9
596	CCc1ccc(cc1)-c1ccccc1	2.95	5707-44-8
597	BrC1CCC(Br)C(Br)CCC(Br)C(Br)CCC1Br	3.64	3194-55-6
598	C1CN=C2CCCCCN2C1	0.08	6674-22-2
599	CCc1ccc2C(=O)c3ccccc3C(=O)c2c1	1.61	84-51-5
600	CCc1cccc(CC)c1	2.77	141-93-5
601	CCc1cccc(CC)c1N(COC)C(=O)CCl	1.12	15972-60-8
602	CCc1ccccc1C=C	2.69	28106-30-1
603	CCc1ccccc1[N+]([O-])=O	1.11	612-22-6
604	CCc1nn(C)c(C(=O)NCc2ccc(cc2)C(C)(C)C)c1Cl	1.14	119168-77-3
605	C1CNCCN1	0.21	110-85-0
606	CN(C(C)=O)c1ccccc1	-0.05	579-10-2
607	CN(C)C(=O)Nc1ccc(Cl)c(Cl)c1	0.74	330-54-1
608	CN(C)C(=S)SSC(=S)N(C)C	0.53	137-26-8
609	CN(C)C1CSSC1	1.72	1631-58-9
610	CN(C)C=O	-0.11	68-12-2
611	CN(C)CCN	0.25	108-00-9
612	CN(C)Cc1ccccc1	0.96	103-83-3
613	C1COCCN1	0.02	110-91-8
614	CN(C)P(=O)(N(C)C)N(C)C	-0.3	680-31-9
615	CN(C)S(=O)(=O)Nc1ccccc1	0.51	UNK-11
616	CN(C)c1ccc(Cc2ccc(cc2)N(C)C)cc1	2.74	101-61-1
617	CN(C)c1ccc(cc1)C(=N)c1ccc(cc1)N(C)C	1.04	2465-27-2
618	CN(C)c1ccc(cc1)C(=O)c1ccc(cc1)N(C)C	1.56	90-94-8
619	CN(C)c1ccc(cc1)C1(OC(=O)c2cc(ccc12)N(C)C)c1ccc(cc1)N(C)C	3.16	1552-42-7
620	CN(C)c1ccc(cc1)[C+](c1ccccc1)c1ccc(cc1)N(C)C	1.84	569-64-2
621	CN(C)c1cccc(c1)C(O)=O	1.1	99-64-9
622	CN(C)c1ccccc1	0.99	121-69-7
623	C1COCCO1	-0.28	123-91-1
624	CN(C1CCCCC1)c1ccc2c(Oc3cc(C)c(Nc4ccccc4)cc3C22OC(=O)c3ccccc23)c1	3.47	55250-84-5
625	CN1CCCCC1	0.5	626-67-5
626	CN1CCOCC1	1	109-02-4
627	CNC(=O)CSP(=S)(OC)OC	0.2	60-51-5
628	CNC(=O)Oc1cc(C)cc(C)c1	0.29	2655-14-3
629	CNC(=O)Oc1cccc2ccccc12	1.09	63-25-2
630	C1C[n+]2ccccc2-c2cccc[n+]12	0.46	85-00-7
631	CNC(=O)Oc1ccccc1C(C)C	0.68	2631-40-5
632	CNc1ccc(cc1)C(O)=O	0.06	10541-83-0
633	CNc1cccc(C)c1	0.86	696-44-6
634	CNc1ccccc1	0.66	100-61-8
635	CNc1ccccc1C	0.86	611-21-2
636	COC(=O)C1(Cl)C(Cl)CCC2(C)C1CCc1cc(ccc21)C(C)C	1.97	57055-39-7
637	COC(=O)Nc1nc2ccccc2[nH]1	0.19	10605-21-7
638	COC(=O)c1cc(cc(c1)S(O)(=O)=O)C(=O)OC	-0.02	3965-55-7
639	C1CC=CCCC=CCCC=C1	3.92	4904-61-4
640	COC(=O)c1ccc2cc(ccc2c1)C(=O)OC	1.58	840-65-3
641	COC(=O)c1ccccc1C(=O)c1ccccc1	0.89	606-28-0
642	COC(C)(C)C	0.18	1634-04-4
643	COCCCN	0.02	5332-73-0
644	COCN(COC)c1nc(nc(n1)N(COC)COC)N(COC)COC	0.28	3089-11-0
645	C1Cc2cccc3cccc1c23	2.88	83-32-9
646	CON(C)C(=O)Nc1ccc(Cl)c(Cl)c1	1.26	330-55-2
647	CON(C)C(=O)Nc1ccc(Cl)cc1	1.28	1746-81-2
648	COP(=O)(OC)OC	-0.26	512-56-1
649	COP(=O)(OC)OC(=CCl)c1cc(Cl)c(Cl)cc1Cl	1.65	961-11-5
650	COP(=O)(OC)OC=C(Cl)Cl	-0.2	62-73-7
651	COP(=O)(OC)Oc1ccc(c(C)c1)[N+]([O-])=O	0.24	2255-17-6
652	C1c2ccccc2-c2ccccc12	2.8	86-73-7
653	COP(=S)(OC)Oc1c(Cl)cc(C)cc1Cl	2.5	57018-04-9
654	COP(=S)(OC)Oc1c(Cl)cccc1C#N	2.33	114012-04-3
655	COP(=S)(OC)Oc1cc(Cl)c(Br)cc1Cl	3.59	2104-96-3
656	COP(=S)(OC)Oc1cc(Cl)c(Cl)cc1Cl	3.58	299-84-3
657	COP(=S)(OC)Oc1cc(Cl)c(I)cc1Cl	3.62	18181-70-9
658	COP(=S)(OC)Oc1ccc(SC)c(C)c1	2.24	55-38-9
659	COP(=S)(OC)Oc1ccc(c(C)c1)S(C)(=O)=O	0.51	3761-42-0
660	COP(=S)(OC)Oc1ccc(c(C)c1)S(C)=O	0.12	3761-41-9
661	COP(=S)(OC)Oc1ccc(c(C)c1)[N+]([O-])=O	1.71	122-14-5
662	COP(=S)(OC)Oc1ccc(c(Cl)c1)[N+]([O-])=O	1.55	500-28-7
663	COP(=S)(OC)Oc1ccc(cc1)C#N	1.56	2636-26-2
664	COP(=S)(OC)Oc1ccc(cc1)[N+]([O-])=O	1.93	298-00-0
665	COP(=S)(OC)Oc1ccc(cc1Cl)[N+]([O-])=O	1.89	2463-84-5
666	COP(=S)(OC)SCN1C(=O)c2ccccc2C1=O	0.24	732-11-6
667	COP1(=S)OCc2ccccc2O1	1.31	3811-49-2
668	CO[Si](CCCOC(=O)C(C)=C)(OC)OC	1.03	2530-85-0
669	COc1c(Cl)c(Cl)c(Cl)c(Cl)c1Cl	4.16	1825-21-4
670	COc1c(Cl)cc(Cl)cc1Cl	2.84	87-40-1
671	COc1c(Cl)ccc(Cl)c1Cl	2.53	50375-10-5
672	COc1c(O)c(Cl)c(Cl)c(Cl)c1Cl	2.92	2539-17-5
673	COc1cc(Cl)c(Cl)c(Cl)c1Cl	3.35	938-86-3
674	BrC1CCC(Br)C(Br)CCC1Br	3.66	3194-57-8
675	C=CC1CCC=CC1	2.24	100-40-3
676	COc1cc(Cl)c(Cl)c(Cl)c1O	2.13	2668-24-8
677	COc1cc(Cl)c(Cl)cc1Cl	2.78	6130-75-2
678	COc1cc(Cl)c(Cl)cc1O	2.03	2460-49-3
679	COc1cc(Oc2ccc(Cl)cc2Cl)ccc1[N+]([O-])=O	3.59	32861-85-1
680	COc1ccc(C(=O)c2ccccc2)c(O)c1	1.99	131-57-7
681	COc1ccc(C)cc1N	0.74	120-71-8
682	C=CCN(CC=C)CC=C	0.53	102-70-5
683	COc1ccc(Cl)c(Cl)c1Cl	3.19	54135-80-7
684	COc1ccc(N)c(c1)[N+]([O-])=O	0.82	96-96-8
685	COc1ccc(Nc2ccc(OC)cc2)cc1	1.88	101-70-2
686	COc1ccc(O)c(c1)C(C)(C)C	1.29	25013-16-5
687	COc1ccc(cc1)C(c1ccc(OC)cc1)C(Cl)(Cl)Cl	2.8	72-43-5
688	COc1ccc(cc1)[N+]([O-])=O	1.08	100-17-4
689	COc1cccc(c1)[N+]([O-])=O	0.76	555-03-3
690	COc1cccc2ccccc12	2.3	2216-69-5
691	C=CCOP(=O)(OCC=C)OCC=C	0.02	1623-19-4
692	COc1ccccc1[N+]([O-])=O	0.6	91-23-6
693	COc1nn(CSP(=S)(OC)OC)c(=O)s1	0.66	950-37-8
694	CS(C)=O	0.35	67-68-5
695	CSc1ccc(O)cc1	0.9	1073-72-9
696	C[N+](C)(C)Cc1ccccc1	-0.26	56-93-9
697	C[N+]1([O-])CCOCC1	1	7529-22-8
698	C[Si](C)(C)O[Si](C)(C)O[Si](C)(C)C	3.73	107-51-7
699	C[Si](C)(C)O[Si](C)(C)O[Si](C)(C)O[Si](C)(C)C	3.44	141-62-8
700	C[Si](C)(C)O[Si](C)(O[Si](C)(C)C)O[Si](C)(C)C	3.54	17928-28-8
701	C[Si]1(C)O[Si](C)(C)O[Si](C)(C)O[Si](C)(C)O1	4.08	556-67-2
702	C[n+]1ccc(cc1)-c1cc[n+](C)cc1	0.28	1910-42-5
703	Cc1[nH]n(-c2ccccc2)c(=O)c1N=Nc1ccc(cc1Cl)-c1ccc(N=Nc2c(C)[nH]n(-c3ccccc3)c2=O)c(Cl)c1	0.48	3520-72-7
704	Cc1c(Br)c(Br)c(Br)c(Br)c1Br	2.38	87-83-2
705	Cc1c(Cc2cc(c(O)c(c2)C(C)(C)C)C(C)(C)C)c(C)c(Cc2cc(c(O)c(c2)C(C)(C)C)C(C)(C)C)c(C)c1Cc1cc(c(O)c(c1)C(C)(C)C)C(C)(C)C	0.46	1709-70-2
706	Cc1c(Cl)c(Cl)c(C)c(Cl)c1Cl	3.61	877-10-1
707	Cc1c(Cl)c(Cl)c(Cl)c(Cl)c1Cl	3.83	877-11-2
708	Cc1c(Cl)cccc1Cl	2.84	118-69-4
709	Cc1c(c(C)c(c(c1[N+]([O-])=O)C(C)(C)C)[N+]([O-])=O)[N+]([O-])=O	3.61	81-15-2
710	C=Cc1ccccc1	1.13	100-42-5
711	Cc1c(cc(cc1[N+]([O-])=O)[N+]([O-])=O)[N+]([O-])=O	0.81	118-96-7
712	Cc1c2ccccc2cc2ccccc12	3.19	779-02-2
713	Cc1cc(=O)n([nH]1)-c1cc(Cl)c(cc1Cl)S(O)(=O)=O	1.16	84-57-1
714	Cc1cc(C)c(O)c(C)c1	0.9	527-60-6
715	Cc1cc(C)c(O)c(c1)C(C)(C)C	2.38	1879-09-0
716	Cc1cc(C)c2ccccc2c1	3.56	575-41-7
717	Cc1cc(C)cc(C)c1	2.43	108-67-8
718	Cc1cc(C)cc(OP(=O)(Oc2cc(C)cc(C)c2)Oc2cc(C)cc(C)c2)c1	2.66	25155-23-1
719	C=Cc1ccccc1C=C	2.54	1321-74-0
720	Cc1cc(Cc2cc(C)cc(c2O)C(C)(C)C)c(O)c(c1)C(C)(C)C	2.36	119-47-1
721	Cc1cc(Cl)c(Cl)cc1Cl	3.87	6639-30-1
722	Cc1cc(Cl)ccc1N	1.21	53906-68-6
723	Cc1cc(Cl)ccc1O	1.18	1570-64-5
724	Cc1cc(Cl)ccc1OCC(O)=O	0.11	94-74-6
725	Cc1cc(NC(=O)Nc2ccc(N=Nc3cc(c4cccc(c4c3)S(O)(=O)=O)S(O)(=O)=O)c(C)c2)ccc1N=Nc1cc(c2cccc(c2c1)S(O)(=O)=O)S(O)(=O)=O	0.2	3214-47-9
726	Cc1cc(NN=C2C(=O)C=Cc3ccccc23)c(cc1Cl)S(O)(=O)=O	1.07	1190723
727	C=Cc1ccncc1	1.91	100-43-6
728	Cc1cc(O)c(cc1Sc1cc(c(O)cc1C)C(C)(C)C)C(C)(C)C	0.79	96-69-5
729	Cc1cc(O)ccc1Cl	0.98	59-50-7
730	Cc1cc(O)ccc1[N+]([O-])=O	1.23	2581-34-2
731	Cc1cc(c(O)c(c1)C(C)(C)C)-n1nc2ccc(Cl)cc2n1	2.9	729335
732	Cc1cc(c(O)c(c1)C(C)(C)C)C(C)(C)C	3.16	128-37-0
733	Cc1cc(c(cc1Cl)N=Nc1c(O)c(cc2ccccc12)C(O)=O)S(O)(=O)=O	0.3	15782-05-5
734	Cc1cc(cc(C)c1OCC1CO1)-c1cc(C)c(OCC2CO2)c(C)c1	0.92	85954-11-6
735	Cc1cc(cc(c1O)[N+]([O-])=O)[N+]([O-])=O	0.16	534-52-1
736	Cc1cc(ccc1N)-c1ccc(N)c(C)c1	1.63	119-93-7
737	Cc1cc(ccc1N=Nc1ccc(N)cc1N)-c1ccc(N=Nc2c(N)c3c(O)c(N=Nc4ccccc4)c(cc3cc2S(O)(=O)=O)S(O)(=O)=O)c(C)c1	1.53	37372-50-2
738	Cc1cc(ccc1NN=C1C(=O)C=Cc2ccccc12)N=Nc1ccccc1C	0.75	85-83-6
739	Cc1cc(ccc1Nc1nc(NCCO)nc(Nc2ccc(cc2C)N=Nc2cc(c3cccc(c3c2)S(O)(=O)=O)S(O)(=O)=O)n1)N=Nc1cc(c2cccc(c2c1)S(O)(=O)=O)S(O)(=O)=O	0.5	50925-42-3
740	Cc1cc2ccccc2c2ccccc12	2.56	883-20-5
741	Cc1ccc(C)c(C)c1	2.19	95-63-6
742	Cc1ccc(C)c(Cc2ccccc2)c1	3.29	13540-50-6
743	Cc1ccc(C)c(N)c1	0.55	95-78-3
744	Cc1ccc(C)cc1	1.17	106-42-3
745	Cc1ccc(C=C)cc1	1.5	622-97-9
746	Cc1ccc(Cl)c(O)c1	0.56	615-74-7
747	Cc1ccc(Cl)cc1	1.77	106-43-4
748	Cc1ccc(Cl)cc1Cl	2.95	95-73-8
749	Cc1ccc(N)c(C)c1	0.82	95-68-1
750	Cc1ccc(N)c(c1)S(O)(=O)=O	0.6	88-44-8
751	Cc1ccc(N)cc1	0.61	106-49-0
752	BrC=Cc1ccccc1	2.26	103-64-0
753	CC(=C)C=C	1.12	78-79-5
754	Cc1ccc(N)cc1C	0.65	95-64-7
755	Cc1ccc(N)cc1N	1.7	95-80-7
756	Cc1ccc(N=Nc2c(O)c(cc3ccccc23)C(O)=O)c(c1)S(O)(=O)=O	0.84	1235134
757	Cc1ccc(NN=C2C(=O)C=Cc3ccccc23)c(c1)[N+]([O-])=O	0.44	2425-85-6
758	Cc1ccc(O)c(C)c1	2.18	105-67-9
759	Cc1ccc(O)c(c1)-n1nc2ccccc2n1	2.47	2440-22-4
760	Cc1ccc(O)c(c1)C(C)(C)C	2.08	2409-55-4
761	Cc1ccc(O)c(c1)[N+]([O-])=O	0.95	119-33-5
762	Cc1ccc(O)cc1[N+]([O-])=O	1	2042-14-0
763	CC(=C)CC(C)(C)C	2.79	107-39-1
764	Cc1ccc(c(C)c1)S(O)(=O)=O	0.13	827-21-4
765	Cc1ccc(c(O)c1)C(C)(C)C	1.96	88-60-8
766	Cc1ccc(c(c1)[N+]([O-])=O)[N+]([O-])=O	0.43	610-39-9
767	Cc1ccc(cc1)S(=O)(=O)Oc1ccc(cc1)N=Nc1ccc(cc1C)-c1ccc(NN=C2C(=O)C=Cc3cc(cc(c23)S(O)(=O)=O)S(O)(=O)=O)c(C)c1	1.83	6459-94-5
768	Cc1ccc(cc1)[N+]([O-])=O	0.88	99-99-0
769	Cc1ccc(cc1N=C=O)N=C=O	2.45	584-84-9
770	Cc1ccc(cc1O)[N+]([O-])=O	0.84	5428-54-6
771	CC(=C)c1ccc(Cl)cc1	2.88	1712-70-5
772	Cc1ccc(cc1S(O)(=O)=O)[N+]([O-])=O	0.1	121-03-9
773	Cc1ccc(cc1[N+]([O-])=O)[N+]([O-])=O	0.89	25321-14-6
774	Cc1ccc2ccccc2c1	3.46	91-57-6
775	CC(=C)c1ccc(O)cc1	1.28	4286-23-1
776	Cc1cccc(C)c1	1.17	108-38-3
777	Cc1cccc(C)c1C	2.31	526-73-8
778	Cc1cccc(C=C)c1	1.55	100-80-1
779	Cc1cccc(Cc2ccccc2)c1Cc1ccccc1	4.05	26898-17-9
780	Cc1cccc(O)c1	1.23	108-39-4
781	Cc1cccc(Oc2ccccc2)c1	3.27	3586-14-9
782	Cc1cccc(c1)[N+]([O-])=O	0.92	99-08-1
783	Cc1cccc(c1O)C(C)(C)C	1.92	2219-82-1
784	CC(=C)c1ccccc1	1.85	98-83-9
785	Cc1cccc2ccccc12	2.79	90-12-0
786	Cc1ccccc1	1.02	108-88-3
787	Cc1ccccc1C	1.15	95-47-6
788	Cc1ccccc1CN	0.57	89-93-0
789	Cc1ccccc1Cl	1.87	95-49-8
790	Cc1ccccc1O	1.03	95-48-7
791	Cc1ccccc1OP(=O)(Oc1ccccc1)Oc1ccccc1	2.52	26444-49-5
792	Cc1ccccc1OP(=O)(Oc1ccccc1C)Oc1ccccc1C	2.9	1330-78-5
793	Cc1ccccc1Oc1ccccc1C	2.52	28299-41-4
794	CC(=O)C(=NNc1ccc(cc1Cl)-c1ccc(NN=C(C(C)=O)C(=O)Nc2ccccc2)c(Cl)c1)C(=O)Nc1ccccc1	0.62	6358-85-6
795	Cc1ccccc1S(N)(=O)=O	0.21	88-19-7
796	Cc1ccccc1S(O)(=O)=O	-0.17	15046-75-0
797	Cc1ccccc1[N+]([O-])=O	1.33	88-72-2
798	Cc1ccccn1	0.49	109-06-8
799	Cc1cccnc1	0.97	108-99-6
800	Cc1ccsc1	0.64	616-44-4
801	Cc1sc(=O)c(-c2ccccc2)c(O)c1C(O)=O	1.89	20076-86-2
802	ClC(COCC(Cl)C(Cl)(Cl)Cl)C(Cl)(Cl)Cl	3.48	127-90-2
803	ClC(Cl)(Cl)C(Cl)(Cl)Cl	2.66	67-72-1
804	ClC(Cl)(Cl)Cl	1.03	56-23-5
805	CC(=O)C(=NNc1ccc(cc1Cl)-c1ccc(NN=C(C(C)=O)C(=O)Nc2ccccc2C)c(Cl)c1)C(=O)Nc1ccccc1C	0.24	5468-75-7
806	ClC(Cl)(Cl)SN1C(=O)C2CC=CCC2C1=O	2.2	133-06-2
807	ClC(Cl)=C	1.03	75-35-4
808	ClC(Cl)=C(Cl)C(Cl)=C(Cl)Cl	3.83	87-68-3
809	ClC(Cl)=C(Cl)Cl	1.74	127-18-4
810	ClC(Cl)=C(Cl)c1c(Cl)c(Cl)c(Cl)c(Cl)c1Cl	3.87	29082-74-4
811	ClC(Cl)=C(c1ccc(Cl)cc1)c1ccc(Cl)cc1	4.51	72-55-9
812	ClC(Cl)C(Cl)Cl	1.03	79-34-5
813	ClC(Cl)Cl	0.8	67-66-3
814	CC(=O)C=Cc1ccccc1	0.74	122-57-6
815	ClC(c1ccccc1)(c1ccccc1)c1ccccc1	2.62	76-83-5
816	ClC12C3(Cl)C4(Cl)C5(Cl)C(Cl)(C1(Cl)C4(Cl)Cl)C2(Cl)C(Cl)(Cl)C35Cl	4.31	2385-85-5
817	ClC1=C(Cl)C(Cl)(Cl)C(Cl)=C1Cl	1.32	77-47-4
818	ClC1=C(Cl)C2(Cl)C3C4CC(C5OC45)C3C1(Cl)C2(Cl)Cl	3.95	60-57-1
819	ClC1=C(Cl)C2(Cl)C3C4CC(C=C4)C3C1(Cl)C2(Cl)Cl	3.86	309-00-2
820	ClC1=C(Cl)C2(Cl)C3CC(Cl)(Cl)CC3C1(Cl)C2(Cl)Cl	4.1	5566-34-7
821	ClC1=C(Cl)C2(Cl)C3CCC4C(CCC3C1(Cl)C2(Cl)Cl)C1(Cl)C(Cl)=C(Cl)C4(Cl)C1(Cl)Cl	1.98	13560-89-9
822	CC(=O)CC(=O)Nc1ccc(cc1C)-c1ccc(NC(=O)CC(C)=O)c(C)c1	-0.02	91-96-3
823	ClC1C(Br)C(Br)C(Br)C(Br)C1Br	2.49	87-84-3
824	ClC1C(Cl)C(Cl)C(Cl)C(Cl)C1Cl	2.92	608-73-1
825	ClC1C=CC2C1C1(Cl)C(Cl)=C(Cl)C2(Cl)C1(Cl)Cl	3.97	76-44-8
826	ClC1CC2C(C1Cl)C1(Cl)C(Cl)=C(Cl)C2(Cl)C1(Cl)Cl	4.29	5103-74-2
827	ClC1CCCCC1	2.35	542-18-7
828	CC(=O)Nc1ccc(N)cc1	0.36	122-80-5
829	ClC=C(Cl)Cl	1.2	79-01-6
830	ClCBr	0.43	74-97-5
831	ClCC(Br)CBr	1.11	96-12-8
832	ClCC(CCl)OP(=O)(OC(CCl)CCl)OC(CCl)CCl	1.21	13674-87-8
833	ClCC(Cl)(Cl)CCl	1.6	13116-53-5
834	ClCC(Cl)C=C	0.6	760-23-6
835	ClCC(Cl)CCl	1.02	96-18-4
836	ClCC(Cl)Cl	0.67	79-00-5
837	ClCC=C	0.54	107-05-1
838	ClCCCBr	0.72	109-70-6
839	BrCC(Br)COP(=O)(OCC(Br)CBr)OCC(Br)CBr	0.38	126-72-7
840	CC(=O)Nc1ccc(cc1)S(O)(=O)=O	0.1	6034-54-4
841	ClCCCCCCCCCl	2.72	2162-99-4
842	ClCCOC(c1ccccc1)c1ccccc1	2.65	32669-06-0
843	ClCCOCCCl	0.66	111-44-4
844	ClCCOP(=O)(OCCCl)OCCCl	0.12	115-96-8
845	ClCCc1ccccc1	1.86	622-24-2
846	ClCCl	1.36	75-09-2
847	ClCS(=O)(=O)Nc1ccc(Cl)c(Cl)c1Oc1cccc(Cl)c1Cl	1.89	100468-92-6
848	ClCc1ccc(cc1)-c1ccc(CCl)cc1	1.19	1667-10-3
849	Clc1c(Cl)c(C#N)c(Cl)c(C#N)c1Cl	1.3	1897-45-6
850	Clc1c(Cl)c(Cl)c(Cl)c(Cl)c1Cl	4.31	118-74-1
851	Clc1c(Cl)c(Cl)c(c(Cl)c1Cl)-c1c(Cl)c(Cl)c(Cl)c(Cl)c1Cl	4.24	2051-24-3
852	Clc1c(Cl)c(Cl)c2Oc3c(Cl)c(Cl)c(Cl)c(Cl)c3Oc2c1Cl	2.94	3268-87-9
853	Clc1c(Cl)c(Cl)c2Oc3ccccc3Oc2c1Cl	3.46	30746-58-8
854	Clc1c(Cl)c(Cl)c2c(Cl)c(Cl)c(Cl)c(Cl)c2c1Cl	2.58	2234-13-1
855	Clc1c(Cl)c(Cl)c2c(oc3c(Cl)c(Cl)c(Cl)c(Cl)c23)c1Cl	2.89	39001-02-0
856	Clc1c(Cl)c(Cl)c2ccccc2c1Cl	3.7	20020-02-4
857	Clc1c2C(=O)n3c(nc4cccc5cccc3c45)-c2c(Cl)c(Cl)c1Cl	1.51	20749-68-2
858	Clc1cc(Cl)c(Cl)c(Cl)c1	3.24	634-90-2
859	Clc1cc(Cl)c(Cl)c(Cl)c1Cl	3.8	608-93-5
860	Clc1cc(Cl)c(Cl)c(c1)-c1c(Cl)c(Cl)c(Cl)c(Cl)c1Cl	5.88	68194-17-2
861	CC(=O)OCCN(CCOC(C)=O)c1ccc(N=Nc2nc3ccc(Cl)cc3s2)c(NC(=O)c2ccccc2)c1	1.22	26630-87-5
862	Clc1cc(Cl)c(Cl)c(c1Cl)-c1c(Cl)c(Cl)cc(Cl)c1Cl	5.82	2136-99-4
863	Clc1cc(Cl)c(Cl)cc1Cl	3.69	95-94-3
864	Clc1cc(Cl)c(Oc2ccccc2)cc1Cl	3.64	52322-80-2
865	CC(=O)Oc1ccc(cc1C1C(=O)Oc2ccc(cc12)C(C)(C)CC(C)(C)C)C(C)(C)CC(C)(C)C	1.56	216698-07-6
866	Clc1cc(Cl)c(c(Cl)c1Cl)-c1c(Cl)c(Cl)cc(Cl)c1Cl	5.29	40186-71-8
867	Clc1cc(Cl)c(cc1Cl)-c1c(Cl)cc(Cl)c(Cl)c1Cl	5.84	52663-69-1
868	Clc1cc(Cl)c(cc1Cl)-c1cc(Cl)c(Cl)c(Cl)c1Cl	5.12	35065-29-3
869	Clc1cc(Cl)c(cc1Cl)-c1cc(Cl)c(Cl)cc1Cl	5.43	35065-27-1
870	Clc1cc(Cl)c(cc1Cl)-c1ccc(Cl)c(Cl)c1Cl	5.44	35065-28-2
871	Clc1cc(Cl)c(cc1Cl)-c1ccccc1	3.88	15862-07-4
872	Clc1cc(Cl)c2Oc3cc(Cl)cc(Cl)c3Oc2c1	3.36	33423-92-6
873	Clc1cc(Cl)c2Oc3ccccc3Oc2c1Cl	2.82	39227-58-2
874	Clc1cc(Cl)cc(Cl)c1	3.27	108-70-3
875	Clc1cc(Cl)cc(c1)-c1cc(Cl)cc(Cl)c1	4.62	32598-13-3
876	Clc1cc(Cl)cc(c1)-c1ccccc1	3.75	34883-41-5
877	Clc1cc(c(Cl)c(Cl)c1Cl)-c1c(Cl)c(Cl)c(Cl)c(Cl)c1Cl	5.71	40186-72-9
878	Clc1cc(c(Cl)c(Cl)c1Cl)-c1cc(Cl)c(Cl)c(Cl)c1Cl	5.46	35694-08-7
879	CC(=O)c1c(O)cc(C)oc1=O	2.12	520-45-6
880	Clc1cc(cc(Cl)c1Cl)-c1cc(Cl)c(Cl)c(Cl)c1	5.97	32774-16-6
881	Clc1cc2Oc3c(Cl)c(Cl)c(Cl)c(Cl)c3Oc2c(Cl)c1Cl	3.2	35822-46-9
882	Clc1cc2Oc3c(Cl)c(Cl)c(Cl)c(Cl)c3Oc2cc1Cl	3.77	39227-28-6
883	Clc1cc2Oc3c(Cl)c(Cl)c(Cl)cc3Oc2c(Cl)c1Cl	3.58	57653-85-7
884	Clc1cc2Oc3cc(Cl)c(Cl)c(Cl)c3Oc2cc1Cl	4.38	40321-76-4
885	Clc1cc2Oc3cc(Cl)c(Cl)cc3Oc2cc1Cl	4.57	1746-01-6
886	Clc1cc2c(oc3c(Cl)c(Cl)c(Cl)c(Cl)c23)c(Cl)c1Cl	3.54	67562-39-4
887	CC(Br)(CBr)COc1c(Br)cc(Br)cc1Br	4.3	36065-30-2
888	Clc1cc2ccccc2c2ccccc12	3.5	947-72-8
889	Clc1cc2oc3c(Cl)c(Cl)c(Cl)cc3c2cc1Cl	4.08	57117-31-4
890	Clc1cc2oc3cc(Cl)c(Cl)cc3c2cc1Cl	3.61	51207-31-9
891	Clc1ccc(C(Cn2ccnc2)OCC=C)c(Cl)c1	1.8	35554-44-0
892	CC(Br)C(=O)Nc1c(C)n(C)n(-c2ccccc2)c1=O	-0.2	92296-04-3
893	Clc1ccc(C=O)cc1	0.32	104-88-1
894	Clc1ccc(Cl)c(Cl)c1	3.09	120-82-1
895	Clc1ccc(Cl)c(Cl)c1Cl	3.7	634-66-2
896	Clc1ccc(Cl)c(c1)-c1c(Cl)c(Cl)c(Cl)c(Cl)c1Cl	5.93	52712-05-7
897	Clc1ccc(Cl)c(c1)-c1c(Cl)c(Cl)cc(Cl)c1Cl	5.54	52663-63-5
898	Clc1ccc(Cl)c(c1)-c1c(Cl)cccc1Cl	4.3	26914-33-0
899	Clc1ccc(Cl)c(c1)-c1cc(Cl)c(Cl)c(Cl)c1Cl	5.81	52712-04-6
900	Clc1ccc(Cl)c(c1)-c1cc(Cl)c(Cl)cc1Cl	5.01	37680-73-2
901	Clc1ccc(Cl)c(c1)-c1cc(Cl)ccc1Cl	4.64	35693-99-3
902	Clc1ccc(Cl)c(c1)-c1ccc(Cl)c(Cl)c1	4.93	32598-11-1
903	Clc1ccc(Cl)c(c1)-c1ccc(Cl)c(Cl)c1Cl	5.2	38380-02-8
904	Clc1ccc(Cl)c(c1)-c1cccc(Cl)c1Cl	4.84	41464-39-5
905	Clc1ccc(Cl)c(c1)-c1ccccc1	3.9	34883-39-1
906	Clc1ccc(Cl)c(c1)-c1ccccc1Cl	4.23	37680-65-2
907	Clc1ccc(Cl)c(c1Cl)-c1c(Cl)ccc(Cl)c1Cl	5.43	38411-22-2
908	BrCC(CBr)(CBr)CBr	2.4	3229-00-3
909	CC(C)(C)C(O)=O	0.11	75-98-9
910	Clc1ccc(Cl)c(c1Cl)-c1cc(Cl)c(Cl)c(Cl)c1Cl	5.7	38411-25-5
911	Clc1ccc(Cl)c2ccccc12	3.75	1825-31-6
912	Clc1ccc(Cl)cc1	2.67	106-46-7
913	Clc1ccc(NC(=O)Nc2ccc(Cl)c(Cl)c2)cc1	1.98	101-20-2
914	Clc1ccc(OCOCC#C)cc1	2.23	UNK-14
915	Clc1ccc(Oc2ccc(Cl)c(Cl)c2)cc1Cl	4.34	56348-72-2
916	Clc1ccc(c(Cl)c1)-c1cc(Cl)c(Cl)c(Cl)c1Cl	5.88	35694-06-5
917	Clc1ccc(c(Cl)c1)-c1cc(Cl)ccc1Cl	4.63	41464-40-8
918	Clc1ccc(c(Cl)c1)-c1ccc(Cl)c(Cl)c1	4.64	32598-10-0
919	CC(C)(C)CC(C)(C)c1cc(O)c(cc1O)C(C)(C)CC(C)(C)C	2.48	903-19-5
920	Clc1ccc(c(Cl)c1)-c1ccc(Cl)cc1Cl	4.32	2437-79-8
921	Clc1ccc(c(Cl)c1)-c1cccc(Cl)c1Cl	4.54	36559-22-5
922	Clc1ccc(c(Cl)c1Cl)-c1c(Cl)c(Cl)c(Cl)c(Cl)c1Cl	5.92	52633-78-2
923	Clc1ccc(c(Cl)c1Cl)-c1ccc(Cl)c(Cl)c1Cl	5.77	38380-07-3
924	Clc1ccc(c(Cl)c1Cl)-c1ccccc1	4.1	25323-68-6
925	CC(C)(C)CC(C)(C)c1ccc(O)cc1	2.44	140-66-9
926	Clc1ccc(cc1)-c1cc(Cl)ccc1Cl	4.13	16606-02-3
927	Clc1ccc(cc1)-c1ccc(Cl)cc1	3.58	2050-68-2
928	Clc1ccc(cc1)-c1ccc(Cl)cc1Cl	4.33	7012-37-5
929	Clc1ccc(cc1)-c1ccccc1	2.56	2051-62-9
930	Clc1ccc(cc1)C(c1ccc(Cl)cc1)C(Cl)(Cl)Cl	4.57	50-29-3
931	Clc1ccc(cc1)S(=O)(=O)c1ccc(Cl)cc1	1.94	80-07-9
932	Clc1ccc(cc1Cl)-c1c(Cl)ccc(Cl)c1Cl	5.04	38380-03-9
933	Clc1ccc(cc1Cl)-c1cc(Cl)c(Cl)c(Cl)c1	5.81	57465-28-8
934	Clc1ccc(cc1Cl)-c1cc(Cl)c(Cl)cc1Cl	4.58	31508-00-6
935	Clc1ccc(cc1Cl)-c1ccc(Cl)c(Cl)c1Cl	4.57	32598-14-4
936	Clc1ccc(cc1Cl)-c1ccccc1Cl	4.36	38444-86-9
937	Clc1ccc2C(=O)c3ccccc3C(=O)c2c1	2.31	131-09-9
938	CC(C)(C)N	0.66	75-64-9
939	Clc1ccc2Oc3c(Cl)c(Cl)c(Cl)cc3Oc2c1	3.3	67028-18-6
940	Clc1ccc2Oc3cc(Cl)ccc3Oc2c1	2.46	33857-26-0
941	CC(C)(C)NCCO	0.3	4620-70-6
942	Clc1cccc(Cl)c1	2.57	541-73-1
943	Clc1cccc(Cl)c1-c1c(Cl)cccc1Cl	3.85	15968-05-5
944	Clc1cccc(Cl)c1Cl	3.02	12002-48-1
945	Clc1cccc(c1Cl)-c1cc(Cl)c(Cl)cc1Cl	5.43	41464-51-1
946	CC(C)(C)O	0.54	75-65-0
947	Clc1cccc(c1Cl)-c1cccc(Cl)c1Cl	4.23	38444-93-8
948	Clc1cccc(c1Cl)-c1ccccc1	4	25512-42-9
949	Clc1cccc2C(=O)c3ccccc3C(=O)c12	2.39	82-44-0
950	Clc1cccc2ccccc12	2.63	90-13-1
951	Clc1ccccc1	1.34	108-90-7
952	Clc1ccccc1-c1c(Cl)c(Cl)c(Cl)c(Cl)c1Cl	3.83	26601-64-9
953	Clc1ccccc1-c1ccccc1	5.3	27323-18-8
954	Clc1ccccc1-c1ccccc1Cl	3.47	13029-08-8
955	Clc1ccccc1Cl	2.43	95-50-1
956	Clc1ccccc1NNc1ccccc1Cl	3.66	782-74-1
957	Clc1ccccn1	1.28	109-09-1
958	Cn1cc(C(O)=Nc2cccc3C4CCC(C4=C(Cl)Cl)c23)c(n1)C(F)F	2.48	1072957-71-1
959	FC(Cl)(Cl)C(F)(Cl)Cl	1.84	76-12-0
960	FC(Cl)(Cl)Cl	1.32	75-69-4
961	FC(F)(Br)C(F)(F)Br	1.56	124-73-2
962	FC(F)(Cl)C(F)(Cl)Cl	1.66	76-13-1
963	CC(C)(C)OO	0.58	75-91-2
964	FC(F)(Cl)C(F)(F)Cl	1.49	76-14-2
965	FC(F)(Cl)Cl	0.84	75-71-8
966	FC(F)(F)C(Cl)Cl	1.36	306-83-2
967	FC(F)(F)C(F)(F)C(F)(F)C(F)(F)C(F)(F)C(F)(F)C(F)(F)C(F)(F)F	3.59	307-34-6
968	FC(F)(F)C(F)(F)C(F)(F)C(F)(F)C(F)(F)C(F)(F)C(F)(F)F	3.5	335-57-9
969	FC(F)(F)C(F)(F)C(F)(F)C(F)(F)C1(F)OC(F)(F)C(F)(F)C1(F)F	3.48	335-36-4
970	FC(F)(F)C(F)(F)C(F)(F)C(F)(F)N(C(F)(F)C(F)(F)C(F)(F)C(F)(F)F)C(F)(F)C(F)(F)C(F)(F)C(F)(F)F	1.42	311-89-7
971	FC(F)(F)c1ccc(Cl)cc1	2.21	98-56-6
972	FP1(F)=NP(F)(Oc2ccccc2)=NP(F)(F)=N1	1.71	33027-68-8
973	N#CC(=C1CCCCC1)c1ccccc1	2.5	10461-98-0
974	NC(N)=N	-1	113-00-8
975	NNC(=O)NN	0.65	497-18-7
976	Nc1cc(cc(c1O)[N+]([O-])=O)[N+]([O-])=O	0.47	96-91-3
977	Nc1nc(N)nc(Nc2nc(N)nc(N)n2)n1	-1	3576-88-3
978	O(c1ccccc1)P1(Oc2ccccc2)=NP(Oc2ccccc2)(Oc2ccccc2)=NP(Oc2ccccc2)(Oc2ccccc2)=N1	1.64	5-6956
979	O=C1C2C3CC(C=C3)C2C(=O)N1c1ccccc1	1.08	26234-46-8
980	O=C1CN2CCC1CC2	0.77	1193-65-3
981	CC(C)(C)c1cc2Cc3cc(cc(c3OP([O-])(=O)Oc2c(c1)C(C)(C)C)C(C)(C)C)C(C)(C)C	0.24	85209-91-2
982	O=P(Nc1ccccc1)(Oc1ccccc1)Oc1ccccc1	1.86	3848-51-9、18995-02-3
983	O=P(Oc1ccccc1)(Oc1ccccc1)Oc1ccc(cc1)-c1ccc(OP(=O)(Oc2ccccc2)Oc2ccccc2)cc1	0.93	17270-01-8
984	O=P(Oc1ccccc1)(Oc1ccccc1)Oc1ccccc1-c1ccccc1	2.82	1204225-72-8
985	CC(C)(C)c1ccc(O)c(c1)[N+]([O-])=O	1.76	3279-07-0
986	OC(=O)C(F)(OC(F)(F)C(F)(F)C(F)(F)F)C(F)(F)F	1.48	2-4099
987	OC(=O)C1=NN(C(=O)C1=NNc1ccc(cc1)S(O)(=O)=O)c1ccc(cc1)S(O)(=O)=O	0.48	1934210
988	OC(=O)C1CC2CC1C1C3CC(C=C3)C21	1.72	46382-54-1
989	OC(=O)CC(F)(F)C(F)(F)C(F)(F)C(F)(F)C(F)(F)C(F)(F)F	1.08	53826-12-3
990	OC1=C(C(=O)c2c1c(Cl)c(Cl)c(Cl)c2Cl)c1ccc2cc(cc(N3C(=O)c4c(C3=O)c(Cl)c(Cl)c(Cl)c4Cl)c2n1)S(O)(=O)=O	2.48	5-6936
991	OCCC(F)(F)C(F)(F)C(F)(F)C(F)(F)C(F)(F)C(F)(F)F	1.76	647-42-7
992	OCCC(F)(F)C(F)(F)C(F)(F)C(F)(F)F	1.57	2043-47-2
993	OCP(CO)(CO)CO	1.97	124-64-1
994	CC(C)(C)c1nn(c(N)c1N=Nc1c(cnn1-c1cc(cc(c1)C(O)=O)C(O)=O)C#N)-c1nc(O)nc(n1)-n1nc(c(N=Nc2c(cnn2-c2cc(cc(c2)C(O)=O)C(O)=O)C#N)c1N)C(C)(C)C	0.4	5-6971
995	OP(O)(=O)c1ccccc1	1.42	34335-10-9
996	CC(C)(CC(=C)c1ccc(O)cc1)c1ccc(O)cc1	1.59	13464-24-9
997	OS(=O)(=O)c1ccc2c3nn(nc3ccc2c1)-c1ccc(cc1)N=Nc1ccc(C=Cc2ccc(cc2S(O)(=O)=O)-n2nc3cc(c4ccccc4c3n2)S(O)(=O)=O)c(c1)S(O)(=O)=O	0.52	5-6931
998	OS(=O)(=O)c1cccc2cc(Cc3ccc4c(cccc4c3)S(O)(=O)=O)ccc12	1	26545584
999	CC(C)(O)C(=O)c1ccc(Cc2ccc(cc2)C(=O)C(C)(C)O)cc1	1.3	4-1936
1000	[N-]=[N+]=C(S(=O)(=O)C1CCCC2(C1)OCCO2)S(=O)(=O)C1CCCC2(C1)OCCO2	1.43	250736-57-3
1001	[O-][N+](=O)N1CN(CN(CN(C1)[N+]([O-])=O)[N+]([O-])=O)[N+]([O-])=O	-0.3	2691-41-0
1002	CC(C)(c1ccc(OC(F)(F)C(F)F)cc1)c1ccc(OC(F)(F)C(F)F)cc1	4.35	1544-19-0
1003	[O-][N+](=O)c1cc(c(Cl)c(c1Cl)[N+]([O-])=O)C(F)(F)F	2.46	3-4602
1004	c1ccc2nc3ccc4ccccc4c3cc2c1	2.02	225-11-6
1005	CC(C)C(C)C(C)(C)c1ccc(OC(F)(F)C(F)F)cc1	3.71	UNK-18
1006	CC(C)C1CCC(C)(CC1c1ccc(O)cc1)c1ccc(O)cc1	2.12	4-1934
1007	Brc1c2C(=O)N(CCN3C(=O)c4c(C3=O)c(Br)c(Br)c(Br)c4Br)C(=O)c2c(Br)c(Br)c1Br	0.26	32588-76-4
1008	CC(C)CC(C)(c1ccc(OC(F)(F)C(F)F)cc1)c1ccc(OC(F)(F)C(F)F)cc1	3.76	UNK-02
1009	CC(C)CC(C)CC(C)c1ccc(O)cc1	2.19	25154523
1010	CC(C)CC(C)c1sccc1N	1.78	183677-34-1
1011	CC(C)c1c(Cl)cc2c(CCC3C(C)(CCCC23C)C(O)=O)c1Cl	2.18	57055397
1012	CC(C)c1cc2cccc(C(C)C)c2cc1S(O)(=O)=O	0.6	1322936
1013	CC(C)c1ccc2cccc(C(C)C)c2c1	3.27	38640629
1014	CC(C)c1ccccc1-c1ccccc1	3.84	25640-78-2
1015	CC(OC(F)(F)C(F)C(F)(F)F)C(F)(F)C(F)C(F)(F)F	3.13	2-4113
1016	CC(S)CC(=O)OCC(COC(=O)CC(C)S)(COC(=O)CC(C)S)COC(=O)CC(C)S	2.23	2-4091
1017	CC12CCC3C(CCc4cc(O)ccc34)C1CCC2O	1.69	50-28-2
1018	CC1C(C)(C)C2=C(C(=O)CCC2)C1(C)C	2.02	33704-61-9
1019	CC1CCCCC1NC(=O)CC(CC(=O)NC1CCCCC1C)C(=O)NC1CCCCC1C	1.41	160535-46-6
1020	CC1CNC(=S)N1	1	2122-19-2
1021	CC1COC(Cn2cncn2)(O1)c1ccc(Oc2ccc(Cl)cc2)cc1Cl	1.98	5-6906
1022	Brc1cccc(Br)c1-c1c(Br)cccc1Br	4.97	97038-96-5
1023	CC=CC(=O)C1C(C)C=CCC1(C)C	2.14	71048-82-3
1024	CC=CC(C)CC(C)CC(C)C	3.25	6842155
1025	CCC(COCC(F)(F)C(F)(F)F)OC(=O)CC(C(C(=O)OC(CC)COCC(F)(F)C(F)(F)F)S(O)(=O)=O)C(=O)OC(CC)COCC(F)(F)C(F)(F)F	1.29	UNK-21
1026	CCC(F)(F)C(F)(F)C(F)(F)C(F)(F)C(F)(F)C(F)(F)F	3.41	80793-17-5
1027	CCCC1CCC(CC1)C1CCC(CC1)C(F)(F)Oc1cc(F)c(F)c(F)c1	1.28	208338-50-5
1028	CCCC1CCC(CC1)C1CCC(CC1)C=C	2.89	116020-44-1
1029	CCCC1CCC(CC1)c1ccc(I)cc1	2.83	111158-11-3
1030	CCCC1CCC(CC1)c1ccc(OCC)c(F)c1F	1.87	174350-05-1
1031	CCCC1OC(OC2C(OC(OC12)c1ccc(CCC)cc1)C(O)CO)c1ccc(CCC)cc1	2.18	5-6933
1032	CCCCC(CC)C(=O)OCCOc1ccc(c(O)c1)-c1nc(nc(n1)-c1ccccc1)-c1ccccc1	1.77	371146-04-2
1033	CCCCC(CC)C(c1ccc(OC(F)(F)C(F)F)cc1)c1ccc(OC(F)(F)C(F)F)cc1	3.19	UNK-03
1034	CCCCC(CC)CN(CC(CC)CCCC)C(=O)C(C)NC(=O)Nc1cccc(c1)-c1nn2nc(c(Cl)c2[nH]1)C(C)(C)C	1.81	5-6950
1035	CCCCC(CC)COC(=O)CCc1cc(c(O)c(c1)C(C)(C)C)C(C)(C)C	1.76	3-4614
1036	CCCCC(O)(Cn1cncn1)c1ccc(Cl)cc1Cl	1.61	79983-71-4
1037	CCCCCC1CCC(CC1)c1ccc(OCC)c(F)c1F	2.07	124729-02-8
1038	CCCCCCC(C)(c1ccc(OC(F)(F)C(F)F)cc1)c1ccc(OC(F)(F)C(F)F)cc1	2.85	UNK-05
1039	CCCCCCC(CCCC)COCC(C[N+]1=Cc2ccccc2CC1)OS(O)(=O)=O	1.03	5-6910
1040	C(Oc1c2ccccc2c(OCC2CO2)c2ccccc12)C1CO1	2.29	5-6904
1041	CCCCCCCCCCCCCCC(C)c1cc(C)cc(C)c1O	0.78	134701-20-5
1042	CCCCCCCCCCCCCOCCOCCOCCOCCOCCOCCOCCOCCO	1.5	930-10-9
1043	CCCCCCCCCCCCSCCC(=O)Oc1cc(C)c(Sc2cc(c(O)cc2C)C(C)(C)C)cc1C(C)(C)C	1.49	3-4611
1044	CCCCCCCCCC[n+]1cccc(COCCCCOCc2ccc[n+](CCCCCCCCCC)c2)c1	2	5-6898
1045	CCCCCCCc1ccc(OC(F)(F)C(F)F)cc1	2.96	UNK-04
1046	CCCCCCS(=O)(=O)c1ccc(Nc2ccc3n(C)c(=O)c(C(=O)c4cccc(c4)S(O)(=O)=O)c4-c5ccccc5C(=O)c2c34)c(c1)S(O)(=O)=O	1.85	5-6939
1047	CCCCCOP(=O)(OCCCCC)OCCCCC	2.48	2528-38-3
1048	CCCCN(CCCC)c1ccc(cc1)[N+](=C1C=CC(C=C1)=[N+](c1ccc(cc1)N(CCCC)CCCC)c1ccc(cc1)N(CCCC)CCCC)c1ccc(cc1)N(CCCC)CCCC	1.8	88358-74-1
1049	CCCCOCCCN1C(=Nc2ccccc2S1(=O)=O)C(N1C(=O)OC(C)(C)C1=O)C(=O)Nc1cc(ccc1SCC(CC)CCCC)C(C)(C)C	1.11	727678-39-9
1050	BrC1CC(Br)CC(Br)CC(Br)CC(Br)CC(Br)C1	4.26	25637-99-4
1051	CCCC[Sn](Cl)(CCCC)CCCC	3.3	1461-22-9
1052	CCCCc1ccc(cc1)-c1ccc(c(F)c1)-c1cc(F)c(c(F)c1)C(F)(F)Oc1cc(F)c(F)c(F)c1	1.41	4-1955
1053	CCCCc1ccc2cccc(c2c1)S(O)(=O)=O	0.18	25638179
1054	CCCN(CCC)C(=O)SCC	1.78	759-94-4
1055	CCCc1ccc(cc1)-c1cc(F)c(c(F)c1)C(F)(F)Oc1cc(F)c(F)c(F)c1	1.81	303186-20-1
1056	CCCc1ccc(cc1)-c1ccc(cc1F)-c1ccc(CC)cc1	1.93	95759-44-7
1057	CCN(CC)C(=S)SSC(=S)N(CC)CC	2.35	97-77-8
1058	CCOC(=O)C(=Cc1ccc(C=C(C(=O)OCC)C(=O)OCC)cc1)C(=O)OCC	1.28	6337-43-5
1059	CCOCOC1CCCCCCCCCCC1	2.74	58567-11-6
1060	C1CC[N+]2(C1)CCCC2	1.85	129211-47-8
1061	CCOc1ccc(Br)c(F)c1F	2.69	156573-09-0
1062	CCS(=O)c1c(N)n(nc1C#N)-c1c(Cl)cc(cc1Cl)C(F)(F)F	0.98	181587-01-9
1063	CC[NH+](CC)CCCNc1nc(NCCC[NH+](CC)CC)nc(Nc2ccc3c(O)c(N=Nc4ccc5[nH]c(=O)[nH]c5c4)c(cc3c2)S(O)(=O)=O)n1	1.52	5-6958
1064	CCc1ccc(C=C)cc1	2.69	567776
1065	CCc1cccc(C)c1Nc1ccc(Nc2c(C)cccc2CC)c2C(=O)c3ccccc3C(=O)c12	0.54	41611-76-1
1066	CCc1cccc(c1)-c1cccc(CC)c1	3.76	13049-38-2
1067	CCn1cc[n+](C)c1C	1.71	307492-75-7
1068	CN(C)CCCNC(N)=O	0.36	2-4106
1069	CN(C)S(=O)(=O)N(SC(F)(Cl)Cl)c1ccc(C)cc1	1.95	731-27-1
1070	CNC(=O)Oc1cc(C)c(N(C)C)c(C)c1	1.42	315-18-4
1071	COC(=O)C(C)Oc1ccc(Oc2ncc(cc2Cl)C(F)(F)F)cc1	1.23	69806-40-2
1072	COC(=O)c1ccc(OC(=O)c2cc(OC)c(OC)cc2OC)cc1	0.26	3-4620
1073	COC(=O)c1nc[nH]c1C(=O)OC	0.77	5-6924
1074	COC(F)(C(F)(F)C(F)(F)F)C(F)(C(F)(F)F)C(F)(F)F	3.41	132182-92-4
1075	COC(F)(F)C(F)(F)C(F)(F)F	1.46	2-4093
1076	COP(=S)(OC)Oc1ccc(Cl)cc1C#N	2.33	2355
1077	COP(=S)(OC)Oc1ccccc1	1.89	33576-92-0
1078	COP(=S)(Oc1cc(Cl)c(Br)cc1Cl)c1ccccc1	3.78	21609-90-5
1079	COc1c(Cl)c(Cl)cc(Cl)c1Cl	3.69	6936-40-9
1080	COc1c(Cl)cc(Cl)c(Cl)c1Cl	3.34	938-22-7
1081	COc1c(O)cc(Cl)c(Cl)c1Cl	2.41	57057-83-7
1082	COc1cc(Cl)c(Cl)c(Cl)c1	3.09	54135-82-9
1083	COc1cc2OCC3Oc4c5CC(Oc5ccc4C(=O)C3c2cc1OC)C(C)=C	1.41	83-79-4
1084	COc1ccc(N=Nc2c(O)c3ccc(N=Nc4c(N)c5c(O)c(N=Nc6ccc7c(O)c(N=Nc8ccccc8S(O)(=O)=O)c(cc7c6)S(O)(=O)=O)c(cc5cc4S(O)(=O)=O)S(O)(=O)=O)c(c3cc2S(O)(=O)=O)S(O)(=O)=O)c(c1)S(O)(=O)=O	0.48	4-1948
1085	COc1ccccc1NC(=O)C(N=Nc1ccc(cc1Cl)-c1ccc(N=NC(C(C)=O)C(=O)Nc2ccccc2OC)c(Cl)c1)C(C)=O	0.49	4531-49-1
1086	COc1ccccc1NC(=O)C(N=Nc1ccc(cc1[N+]([O-])=O)S(O)(=O)=O)C(C)=O	1	3-4637
1087	CSc1c(C)cc(O)cc1C	1.16	7379-51-3
1088	C=Cc1ccc(C=C)cc1	2.48	105-06-6
1089	C[Si](C)(C)O[Si](C)(C)O[Si](C)(C)O[Si](C)(C)O[Si](C)(C)C	3.13	141-63-9
1090	C=Cc1cccc(C=C)c1	2.54	108-57-6
1091	Cc1c(Cl)cccc1[N+]([O-])=O	1.99	83-42-1
1092	Cc1c(N=Nc2nc(c(N=Nc3cc(c4cc(cc(c4c3)S(O)(=O)=O)S(O)(=O)=O)S(O)(=O)=O)s2)-c2ccc3ccccc3c2)c(Nc2ccc(cc2)S(O)(=O)=O)nc(Nc2ccc(cc2)S(O)(=O)=O)c1C#N	1.28	5-6909
1093	Cc1cc(Cc2ccccc2)ccc1Cc1ccccc1	4	26898179
1094	Cc1cc(Cl)nc(Cl)c1C#N	0.59	875-35-4
1095	Cc1cc(N=Nc2c(O)c3ccc(N=Nc4c(Nc5ccccc5)ccc5c(O)c(N=Nc6ccc7c(O)c(N=Nc8ccccc8S(O)(=O)=O)c(cc7c6)S(O)(=O)=O)c(cc45)S(O)(=O)=O)c(c3cc2S(O)(=O)=O)S(O)(=O)=O)c(OCCCS(O)(=O)=O)cc1N=Nc1cc(cc2cc(cc(O)c12)S(O)(=O)=O)S(O)(=O)=O	1.59	4-1949
1096	Cc1cc(OCC2CO2)cc(Br)c1Br	1.11	30171803
1097	Cc1cc(c(C)c(C)c1O)-c1cc(C)c(O)c(C)c1C	2.65	19956-76-4
1098	CC(=C)C(=O)OCCC(F)(F)C(F)(F)C(F)(F)C(F)(F)C(F)(F)C(F)(F)F	1.08	2144-53-8
1099	CC(=C)C1CC2CC1C=C2	2.98	4-1950
1100	Cc1ccc(Cl)cc1[N+]([O-])=O	1.92	89-59-8
1101	Cc1ccc(cc1)C1CCC(CC1)C1CCC(CC1)C=C	2.08	155041-85-3
1102	Cc1ccc(cc1C)C1OCC2OC(OC(C(O)CO)C2O1)c1ccc(C)c(C)c1	1.23	135861-56-2
1103	Cc1ccc(cc1Cl)[N+]([O-])=O	1.69	121-86-8
1104	Cc1ccc2c(ccc3ccccc23)c1	3.48	2531-84-2
1105	ClC12C(=O)C3(Cl)C4(Cl)C1(Cl)C1(Cl)C2(Cl)C3(Cl)C4(Cl)C1(Cl)Cl	3.19	143-50-0
1106	ClC1=C(Cl)C2(Cl)CC1(Cl)C(Cl)=C2Cl	3.81	28680-44-6
1107	ClC1CC2(Cl)C(Cl)=C(Cl)C1(Cl)C2(Cl)Cl	4.05	2440-02-0
1108	CC(=O)OC1CCCCC1C(C)(C)C	2.28	20298-69-5
1109	Cl[Sn](c1ccccc1)(c1ccccc1)c1ccccc1	3.14	639-58-7
1110	Clc1cc(Cl)c2c(oc3c(Cl)cc(Cl)c(Cl)c23)c1Cl	2.96	75627-02-0
1111	Clc1cc2Oc3cc(Cl)c(Cl)c(Cl)c3Oc2c(Cl)c1Cl	3.92	19408-74-3
1112	Clc1cc2c(oc3c(Cl)c(Cl)c(Cl)cc23)c(Cl)c1Cl	3.98	60851-34-5
1113	Clc1cc2oc3c(Cl)c(Cl)c(Cl)c(Cl)c3c2cc1Cl	3.9	70648-26-9
1114	Clc1cc2oc3c(Cl)c(Cl)c(Cl)cc3c2c(Cl)c1Cl	3.94	57117-44-9
1115	Clc1cc2oc3c(Cl)c(Cl)cc(Cl)c3c2c(Cl)c1Cl	3.2	92341-06-5
1116	Clc1cc2oc3cc(Cl)c(Cl)c(Cl)c3c2cc1Cl	3.58	57117-41-6
1117	Clc1ccc(Cl)c(c1)C(=O)c1ccccc1	1.89	16611-67-9
1118	Clc1ccc(Oc2ccccc2)c(Cl)c1	3.97	51892-26-3
1119	CC(C)(C)CC(C)(C)c1ccc(OC(F)(F)C(F)F)cc1	3.92	UNK-06
1120	Clc1ccc2Oc3c(Cl)c(Cl)c(Cl)c(Cl)c3Oc2c1Cl	4	39227286
1121	Clc1ccc2c(oc3c(Cl)c(Cl)c(Cl)c(Cl)c23)c1Cl	2.78	79060-60-9
1122	Clc1ccc2c(oc3c(Cl)c(Cl)c(Cl)cc23)c1Cl	3.57	57117-43-8
1123	Clc1ccc2c(oc3cc(Cl)c(Cl)cc23)c1Cl	2.72	57117-39-2
1124	Clc1ccc2cc(Cl)cc(Cl)c2c1	4.43	55720-37-1
1125	Clc1cccc2cccc(Cl)c12	3.79	2050-74-0
1126	Cn1c(cc(=O)n(-c2ccc(Cl)c(c2)C(=O)OC(C)(C)C(=O)OCC=C)c1=O)C(F)(F)F	0.6	134605-64-4
1127	FC(F)(F)C(F)(F)C(F)(F)C(F)(F)C(F)(F)C(F)(F)C=C	2.58	25291-17-2
1128	FC(F)(F)C(F)(F)C(F)(F)C(F)(F)CCOC(=O)C(Cl)=C	1.87	701909-41-3
1129	FC(F)(F)C(F)(F)C(F)(F)C(F)(F)CCOC(=O)C=C	1.72	52591-27-2
